# Supplementary material for: Catalytic defluorinative [3 + 2] cycloaddition of trifluoromethylalkenes with alkynes via reduction of nickel(ii) fluoride species
Source: Royal Society of Chemistry journal article supplement (doi:10.1039/c5dt02160j), 2015-01-01
Supplement: c5dt02160j1.pdf [file c5dt02160j1.pdf]

# Catalytic Defluorinative [3+2] Cycloaddition of Trifluoromethylalkenes with Alkynes via Reduction of Nickel(II) Fluoride Species

Takeshi Fujita, Tomohiro Arita, Tomohiro Ichitsuka, Junji Ichikawa\*

*Division of Chemistry, Faculty of Pure and Applied Sciences, University of Tsukuba  
Tsukuba, Ibaraki 305-8571, Japan  
junji@chem.tsukuba.ac.jp*

## — *Supporting Information* —

### Table of Contents

|                                                                                                    |     |
|----------------------------------------------------------------------------------------------------|-----|
| General Statements .....                                                                           | S2  |
| Synthesis of 2-Fluoro-1,3-cyclopentadienes <b>3</b> via Nickel-Catalyzed [3+2] Cycloaddition ..... | S3  |
| Synthesis of 5,6,7,7a-Tetrahydro-4 <i>H</i> -indene <b>9</b> .....                                 | S6  |
| References .....                                                                                   | S10 |
| <sup>1</sup> H, <sup>13</sup> C, and <sup>19</sup> F NMR spectra .....                             | S11 |

## General Statements

IR spectra were recorded on a Horiba FT-300S spectrometer by the attenuated total reflectance (ATR method). NMR spectra were recorded on a Bruker Avance 500 spectrometer at 500 MHz ( $^1\text{H}$  NMR), at 126 MHz ( $^{13}\text{C}$  NMR), and at 470 MHz ( $^{19}\text{F}$  NMR). Chemical shifts were given in ppm relative to internal  $\text{Me}_4\text{Si}$  (for  $^1\text{H}$  NMR:  $\delta = 0.00$ ),  $\text{CDCl}_3$  (for  $^{13}\text{C}$  NMR:  $\delta = 77.0$ ), and  $\text{C}_6\text{F}_6$  (for  $^{19}\text{F}$  NMR:  $\delta = 0.0$ ). Mass spectra were measured on a JEOL JMS-T100GCV spectrometer. Elemental analyses were performed at the Elemental Analysis Laboratory, Division of Chemistry, Faculty of Pure and Applied Sciences, University of Tsukuba. X-ray diffraction study was performed on a Bruker APEXII ULTRA instrument equipped with a CCD diffractometer using  $\text{Mo K}\alpha$  (graphite monochromated,  $\lambda = 0.71069 \text{ \AA}$ ) radiation. The structure was solved by direct methods (SIR97).<sup>1</sup> The positional and thermal parameters of non-hydrogen atoms were refined anisotropically on  $F^2$  by the full-matrix least-squares method using SHELXS-97.<sup>2</sup> Hydrogen atoms were placed at calculated positions and refined with the riding mode on their corresponding carbon atoms. The CCDC deposition number of compound **9** is 1402817.

Column chromatography and preparative thin-layer chromatography (PTLC) were conducted on silica gel (Silica Gel 60 N, Kanto Chemical Co., Inc. for column chromatography and Wakogel B-5F, Wako Pure Chemical Industries for PTLC, respectively). All the reactions were conducted under argon. Toluene was dried by a solvent-purification system (GlassContour) equipped with a columns of activated alumina followed by a column of Q-5 scavenger (Engelhard). 1,4-Dioxane was distilled from sodium, and stored over activated molecular sieves 4A.

$\text{Ni}(\text{cod})_2$  and  $\text{PCy}_3$  were purchased from Sigma-Aldrich Co. and stored in a globe box under an argon atmosphere. 4-Octyne (**2a**), 4-methylpent-2-yne (**2b**), bis(neopentylglycolato)diboron ( $\text{B}_2(\text{nep})_2$ ), *t*-BuOK, and  $\text{MgF}_2$  were purchased from Sigma-Aldrich Co., Tokyo Chemical Industry Co., Ltd., or Wako Pure Chemical Industries, Ltd. These compounds were used without further purification. Other liquid reagents were purified by distillation and solid reagents were purified by recrystallization. 2-Trifluoromethyl-1-alkenes **1a–g**<sup>3</sup> and 7-bromohept-1-yne<sup>4</sup> were prepared according to the literature procedures.

## Synthesis of 2-Fluoro-1,3-cyclopentadienes **3** via Nickel-Catalyzed [3+2] Cycloaddition

### 1-[4-(2-Fluoro-3,4-dipropylcyclopenta-1,3-dien-1-yl)phenyl]ethan-1-one (**3aa**) < Typical procedure >

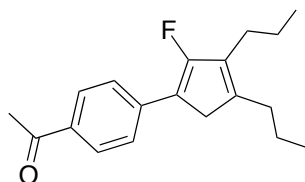

In a 30-mL Schlenk tube were placed  $\text{Ni}(\text{cod})_2$  (14 mg, 0.051 mmol),  $\text{PCy}_3$  (29 mg, 0.10 mmol),  $\text{B}_2(\text{nep})_2$  (62 mg, 0.27 mmol), *t*-BuOK (30 mg, 0.27 mmol),  $\text{MgF}_2$  (16 mg, 0.26 mmol), and 1,4-dioxane (3 mL). After stirring for 10 min at room temperature, 2-trifluoromethyl-1-alkene **1a** (53 mg, 0.25 mmol) and 4-octyne (**2a**, 30 mg, 0.28 mmol) were added to the mixture. After stirring for 3 h at 80 °C, the reaction was quenched with aqueous HCl (1 M). Organic materials were extracted with  $\text{Et}_2\text{O}$  two times. The combined extracts were washed with brine and dried over  $\text{Na}_2\text{SO}_4$ . After removal of the solvent under reduced pressure, the residue was purified by silica gel column chromatography (hexane:EtOAc = 50:1) to give 2-fluoro-1,3-cyclopentadiene **3aa** (38 mg, 53%) as a yellow solid.

**3aa**: IR (neat):  $\tilde{\nu}$  = 2960, 2870, 1670, 1585, 1273, 912, 742  $\text{cm}^{-1}$ .  $^1\text{H}$  NMR:  $\delta$  0.95 (t,  $J$  = 7.4 Hz, 3H), 0.95 (t,  $J$  = 7.3 Hz, 3H), 1.48–1.63 (m, 4H), 2.29 (t,  $J$  = 7.6 Hz, 2H), 2.36 (t,  $J$  = 7.7 Hz, 2H), 2.58 (s, 3H), 3.20 (d,  $J_{\text{HF}}$  = 6.5 Hz, 2H), 7.57 (d,  $J$  = 8.5 Hz, 2H), 7.91 (d,  $J$  = 8.5 Hz, 2H).  $^{13}\text{C}$  NMR:  $\delta$  13.9, 14.1, 22.3, 23.1, 26.0, 26.4, 30.8, 37.8 (d,  $J_{\text{CF}}$  = 8 Hz), 112.8 (d,  $J_{\text{CF}}$  = 2 Hz), 125.1 (d,  $J_{\text{CF}}$  = 7 Hz), 128.8, 133.8, 134.6 (d,  $J_{\text{CF}}$  = 25 Hz), 138.6 (d,  $J_{\text{CF}}$  = 5 Hz), 143.2 (d,  $J_{\text{CF}}$  = 6 Hz), 161.2 (d,  $J_{\text{CF}}$  = 285 Hz), 197.4.  $^{19}\text{F}$  NMR:  $\delta$  43.9 (t,  $J_{\text{FH}}$  = 7 Hz). HRMS (EI<sup>+</sup>): Calcd for  $\text{C}_{19}\text{H}_{23}\text{FO}$  [ $\text{M}$ ]<sup>+</sup> 286.1733, Found 286.1730.

Spectral data for this compound showed good agreement with the literature data.<sup>5</sup>

### 1-{4-[2-Fluoro-3-methyl-4-(propan-2-yl)cyclopenta-1,3-dien-1-yl]phenyl}ethan-1-one (**3ab**)

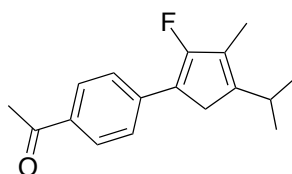

Fluorocyclopentadiene **3ab** was synthesized according to the typical procedure using 2-trifluoromethyl-1-alkene **1a** (53 mg, 0.25 mmol), 4-methylpent-2-yne (**2b**, 23 mg, 0.28 mmol),  $\text{Ni}(\text{cod})_2$  (14 mg, 0.051 mmol),  $\text{PCy}_3$  (29 mg, 0.10 mmol),  $\text{B}_2(\text{nep})_2$  (62 mg, 0.27 mmol), *t*-BuOK (30 mg, 0.27 mmol),  $\text{MgF}_2$  (16 mg, 0.26 mmol), and 1,4-dioxane (3 mL) for 3 h at 80 °C. Purification by silica gel column chromatography (hexane/EtOAc = 50:1) gave **3ab** (45 mg, 70%) as a yellow solid.

Spectral data for this compound showed good agreement with the literature data.<sup>5</sup>

### 1-Fluoro-3-[2-fluoro-3-methyl-4-(propan-2-yl)cyclopenta-1,3-dien-1-yl]benzene (3bb)

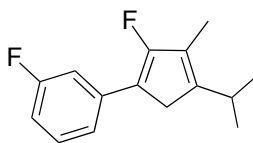

Fluorocyclopentadiene **3bb** was synthesized according to the typical procedure using 2-trifluoromethyl-1-alkene **1b** (48 mg, 0.25 mmol), 4-methylpent-2-yne (**2b**, 23 mg, 0.28 mmol), Ni(cod)<sub>2</sub> (14 mg, 0.051 mmol), PCy<sub>3</sub> (29 mg, 0.10 mmol), B<sub>2</sub>(nep)<sub>2</sub> (62 mg, 0.27 mmol), *t*-BuOK (30 mg, 0.27 mmol), MgF<sub>2</sub> (16 mg, 0.26 mmol), and 1,4-dioxane (3 mL) for 3 h at 80 °C. Purification by silica gel column chromatography (hexane) gave **3bb** (29 mg, 50%) as a white solid.

**3bb**: IR (neat):  $\tilde{\nu}$  = 2962, 2922, 1651, 1610, 1595, 1385, 1365, 1269, 1176, 858, 781, 686 cm<sup>-1</sup>. <sup>1</sup>H NMR:  $\delta$  1.05 (d,  $J$  = 7.0 Hz, 6H), 1.80 (s, 3H), 2.84 (septet, 1H), 3.04 (dd,  $J_{\text{HF}}$  = 6.5 Hz,  $J$  = 1.5 Hz, 2H), 6.72–6.76 (m, 1H), 7.13–7.21 (m, 3H). <sup>13</sup>C NMR:  $\delta$  8.6, 22.5, 27.4 (d,  $J_{\text{CF}}$  = 2 Hz), 34.1 (d,  $J_{\text{CF}}$  = 8 Hz), 112.0 (d,  $J_{\text{CF}}$  = 19 Hz), 112.1 (dd,  $J_{\text{CF}}$  = 22, 7 Hz), 112.2 (dd,  $J_{\text{CF}}$  = 22, 2 Hz), 121.0 (dd,  $J_{\text{CF}}$  = 7, 3 Hz), 128.0 (d,  $J_{\text{CF}}$  = 26 Hz), 129.8 (d,  $J_{\text{CF}}$  = 8 Hz), 136.0 (dd,  $J_{\text{CF}}$  = 8, 5 Hz), 147.1 (d,  $J_{\text{CF}}$  = 4 Hz), 159.6 (d,  $J_{\text{CF}}$  = 281 Hz), 163.1 (d,  $J_{\text{CF}}$  = 245 Hz). <sup>19</sup>F NMR:  $\delta$  38.9 (t,  $J_{\text{FH}}$  = 6 Hz, 1F), 48.80–48.85 (m, 1F). HRMS (EI<sup>+</sup>): Calcd for C<sub>15</sub>H<sub>16</sub>F<sub>2</sub> [M]<sup>+</sup> 234.1220, Found 234.1209.

### 4-[2-Fluoro-3-methyl-4-(propan-2-yl)cyclopenta-1,3-dien-1-yl]benzonitrile (3cb)

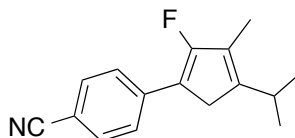

Fluorocyclopentadiene **3cb** was synthesized according to the typical procedure using 2-trifluoromethyl-1-alkene **1c** (50 mg, 0.25 mmol), 4-methylpent-2-yne (**2b**, 23 mg, 0.28 mmol), Ni(cod)<sub>2</sub> (14 mg, 0.051 mmol), PCy<sub>3</sub> (29 mg, 0.10 mmol), B<sub>2</sub>(nep)<sub>2</sub> (62 mg, 0.27 mmol), *t*-BuOK (30 mg, 0.27 mmol), MgF<sub>2</sub> (16 mg, 0.26 mmol), and 1,4-dioxane (3 mL) for 3 h at 80 °C. Purification by silica gel column chromatography (hexane/EtOAc = 50:1) gave **3cb** (27 mg, 45%) as a white solid.

**3cb**: IR (neat):  $\tilde{\nu}$  = 2958, 2868, 2222, 1585, 912, 742 cm<sup>-1</sup>. <sup>1</sup>H NMR:  $\delta$  1.14 (d,  $J$  = 6.9 Hz, 6H), 1.89 (s, 3H), 2.94 (septet,  $J$  = 6.9 Hz, 1H), 3.15 (dd,  $J_{\text{HF}}$  = 6.8 Hz,  $J$  = 1.5 Hz, 2H), 7.57 (s, 4H). <sup>13</sup>C NMR:  $\delta$  8.5, 22.4, 27.5 (d,  $J_{\text{CF}}$  = 2 Hz), 33.9 (d,  $J_{\text{CF}}$  = 7 Hz), 108.0 (d,  $J_{\text{CF}}$  = 3 Hz), 111.6 (d,  $J_{\text{CF}}$  = 2 Hz), 119.4, 125.4 (d,  $J_{\text{CF}}$  = 7 Hz), 128.3 (d,  $J_{\text{CF}}$  = 26 Hz), 132.2, 138.1 (d,  $J_{\text{CF}}$  = 5 Hz), 149.3 (d,  $J_{\text{CF}}$  = 4 Hz), 161.4 (d,  $J_{\text{CF}}$  = 285 Hz). <sup>19</sup>F NMR:  $\delta$  43.4 (t,  $J_{\text{FH}}$  = 7 Hz). HRMS (EI<sup>+</sup>): Calcd for C<sub>16</sub>H<sub>16</sub>FN [M]<sup>+</sup> 241.1267, Found 241.1270.



#### 1-[2-Fluoro-3-methyl-4-(propan-2-yl)cyclopenta-1,3-dien-1-yl]-3-(trifluoromethyl)benzene (3db)

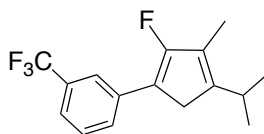

Fluorocyclopentadiene **3db** was synthesized according to the typical procedure using 2-trifluoromethyl-1-alkene **1d** (60 mg, 0.25 mmol), 4-methylpent-2-yne (**2b**, 23 mg, 0.28 mmol), Ni(cod)<sub>2</sub> (14 mg, 0.051 mmol), PCy<sub>3</sub> (29 mg, 0.10 mmol), B<sub>2</sub>(nep)<sub>2</sub> (62 mg, 0.27 mmol), *t*-BuOK (30 mg, 0.27 mmol), MgF<sub>2</sub> (16 mg, 0.26 mmol), and toluene (3 mL) for 3 h at 80 °C. Purification by silica gel column chromatography (hexane) gave **3db** (29 mg, 40%) as a colorless liquid.

**3db**: IR (neat):  $\tilde{\nu}$  = 2964, 1593, 1327, 1122, 1072, 796, 696 cm<sup>-1</sup>. <sup>1</sup>H NMR:  $\delta$  1.14 (d,  $J$  = 6.9 Hz, 6H), 1.88 (s, 3H), 2.93 (septet,  $J$  = 6.9 Hz, 1H), 3.16 (dd,  $J_{\text{HF}}$  = 6.6 Hz,  $J$  = 1.6 Hz, 2H), 7.36 (d,  $J$  = 7.8 Hz, 1H), 7.41 (dd,  $J$  = 7.8, 7.8 Hz, 1H), 7.69–7.70 (m, 2H). <sup>13</sup>C NMR:  $\delta$  8.6, 22.5, 27.5, 34.0 (d,  $J_{\text{CF}}$  = 8 Hz), 111.6 (d,  $J_{\text{CF}}$  = 2 Hz), 121.7–121.8 (m), 121.8–121.9 (m), 124.3 (q,  $J_{\text{CF}}$  = 270 Hz), 128.0 (d,  $J_{\text{CF}}$  = 26 Hz), 128.5 (d,  $J_{\text{CF}}$  = 7 Hz), 128.9, 130.8 (q,  $J_{\text{CF}}$  = 32 Hz), 134.6 (d,  $J_{\text{CF}}$  = 5 Hz), 147.5 (d,  $J_{\text{CF}}$  = 4 Hz), 160.0 (d,  $J_{\text{CF}}$  = 279 Hz). <sup>19</sup>F NMR:  $\delta$  39.3 (t,  $J_{\text{FH}}$  = 7 Hz, 1F), 98.9 (s, 3F). HRMS (EI<sup>+</sup>): Calcd for C<sub>16</sub>H<sub>16</sub>F<sub>4</sub> [M]<sup>+</sup> 284.1188, Found: 284.1186.

#### [2-Fluoro-3-methyl-4-(propan-2-yl)cyclopenta-1,3-dien-1-yl]benzene (3eb)

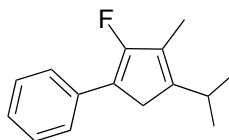

Fluorocyclopentadiene **3eb** was synthesized according to the typical procedure using  $\alpha$ -(trifluoromethyl)styrene (**1e**, 43 mg, 0.25 mmol), 4-methylpent-2-yne (**2b**, 23 mg, 0.28 mmol), Ni(cod)<sub>2</sub> (14 mg, 0.051 mmol), PCy<sub>3</sub> (29 mg, 0.10 mmol), B<sub>2</sub>(nep)<sub>2</sub> (62 mg, 0.27 mmol), *t*-BuOK (30 mg, 0.27 mmol), MgF<sub>2</sub> (16 mg, 0.26 mmol), and 1,4-dioxane (3 mL) for 3 h at 80 °C. Purification by silica gel column chromatography (hexane) gave **3eb** (29 mg, 54%) as a white solid.

Spectral data for this compound showed good agreement with the literature data.<sup>5</sup>

#### 4-[2-Fluoro-3-methyl-4-(propan-2-yl)cyclopenta-1,3-dien-1-yl]-1,1'-biphenyl (3fb)

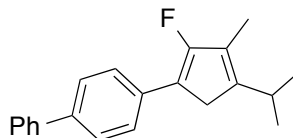

Fluorocyclopentadiene **3fb** was synthesized according to the typical procedure using

4-(3,3,3-trifluoroprop-1-en-2-yl)-1,1'-biphenyl (**1f**, 63 mg, 0.25 mmol), 4-methylpent-2-yne (**2b**, 23 mg, 0.28 mmol), Ni(cod)<sub>2</sub> (14 mg, 0.051 mmol), PCy<sub>3</sub> (29 mg, 0.10 mmol), B<sub>2</sub>(nep)<sub>2</sub> (62 mg, 0.27 mmol), *t*-BuOK (30 mg, 0.27 mmol), MgF<sub>2</sub> (16 mg, 0.26 mmol), and 1,4-dioxane (3 mL) for 3 h at 80 °C. Purification by silica gel column chromatography (hexane) gave **3fb** (33 mg, 45%) as a pale yellow solid.

**3fb**: IR (neat):  $\tilde{\nu}$  = 3030, 2960, 1591, 1489, 1365, 1192, 1109, 912, 853, 764, 742, 696 cm<sup>-1</sup>. <sup>1</sup>H NMR:  $\delta$  1.14 (d, *J* = 7.0 Hz, 6H), 1.89 (s, 3H), 2.93 (septet, *J* = 6.9 Hz, 1H), 3.17 (d, *J*<sub>HF</sub> = 6.1 Hz, 2H), 7.32 (t, *J* = 7.5 Hz, 1H), 7.43 (dd, *J* = 7.5, 7.5 Hz, 2H), 7.55–7.62 (m, 6H). <sup>13</sup>C NMR:  $\delta$  8.7, 22.6, 27.4 (d, *J*<sub>CF</sub> = 2 Hz), 34.1 (d, *J*<sub>CF</sub> = 8 Hz), 112.5 (d, *J*<sub>CF</sub> = 3 Hz), 125.8 (d, *J*<sub>CF</sub> = 7 Hz), 126.8, 127.0, 127.1, 128.1 (d, *J*<sub>CF</sub> = 26 Hz), 128.7, 133.0, 138.0, 140.9, 146.6 (d, *J*<sub>CF</sub> = 4 Hz), 159.0 (d, *J*<sub>CF</sub> = 278 Hz). <sup>19</sup>F NMR:  $\delta$  37.3 (t, *J*<sub>FH</sub> = 6 Hz). HRMS (EI<sup>+</sup>): Calcd for C<sub>21</sub>H<sub>21</sub>F [M]<sup>+</sup> 292.1627, Found: 292.1634.

#### ***tert*-Butyl 2-fluoro-3-methyl-4-(propan-2-yl)cyclopenta-1,3-diene-1-carboxylate (**3gb**)**

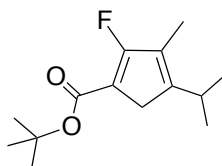

Fluorocyclopentadiene **3gb** was synthesized according to the typical procedure using *tert*-butyl 2-(trifluoromethyl)acrylate (**1g**, 49 mg, 0.25 mmol), 4-methylpent-2-yne (**2b**, 23 mg, 0.28 mmol), Ni(cod)<sub>2</sub> (14 mg, 0.051 mmol), PCy<sub>3</sub> (29 mg, 0.10 mmol), B<sub>2</sub>(nep)<sub>2</sub> (62 mg, 0.27 mmol), *t*-BuOK (30 mg, 0.27 mmol), MgF<sub>2</sub> (16 mg, 0.26 mmol), and toluene (3 mL) for 3 h at 80 °C. Purification by silica gel column chromatography (pentane/Et<sub>2</sub>O = 10:1) gave **3gb** (25 mg, 42%) as a colorless liquid.

Spectral data for this compound showed good agreement with the literature data.<sup>5</sup>

### **Synthesis of 5,6,7,7a-Tetrahydro-4*H*-indene **9****

#### **Preparation of 1-Trifluoromethyl-1-en-7-yne **5****

##### **(i) Hept-6-yn-1-yltriphenylphosphonium bromide**

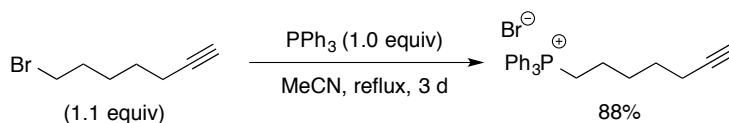

To an acetonitrile solution (15 mL) of triphenylphosphine (3.93 g, 15.0 mmol) was added 7-bromohept-1-yne (2.89 g, 16.5 mmol). After refluxed for 3 d, the reaction mixture was allowed to cool to room temperature, and the solvent was removed under reduced pressure. Toluene was added and the resulting heterogeneous mixture, and

the title compound (5.76 g, 88%) was obtained as a white solid.

**Hept-6-yn-1-yltriphenylphosphonium bromide:** IR (neat):  $\tilde{\nu}$  = 2937, 2866, 1439, 1113, 914, 723, 530  $\text{cm}^{-1}$ .  $^1\text{H}$  NMR:  $\delta$  1.54 (tt,  $J$  = 7.2, 7.2 Hz, 2H), 1.65–1.69 (m, 2H), 1.80 (tt,  $J$  = 7.2, 7.2 Hz, 2H), 1.86 (t,  $J$  = 2.6 Hz, 1H), 2.15 (td,  $J$  = 7.2, 2.6 Hz, 2H), 3.87–3.93 (m, 2H), 7.69–7.72 (m, 6H), 7.78–7.82 (m, 3H), 7.85–7.89 (m, 6H).  $^{13}\text{C}$  NMR:  $\delta$  18.0, 22.2 (d,  $J_{\text{CP}}$  = 4 Hz), 22.7 (d,  $J_{\text{CP}}$  = 49 Hz), 27.8, 29.3 (d,  $J_{\text{CP}}$  = 16 Hz), 68.4, 84.2, 118.4 (d,  $J_{\text{CP}}$  = 85 Hz), 130.4 (d,  $J_{\text{CP}}$  = 12 Hz), 133.7 (d,  $J_{\text{CP}}$  = 10 Hz), 134.9 (d,  $J_{\text{CP}}$  = 3 Hz). HRMS (APCI+): Calcd for  $\text{C}_{25}\text{H}_{27}\text{BrP}$   $[\text{M} + \text{H}]^+$  437.1034, Found 437.1029.

**(ii) 1,1,1-Trifluoro-2-phenylnon-2-en-8-yne (8)**

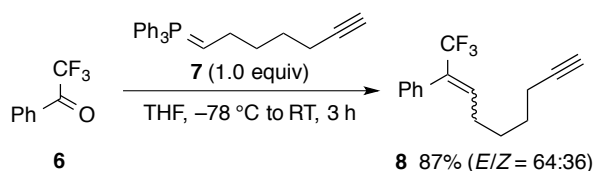

To a tetrahydrofuran solution (5 mL) of hept-6-yn-1-yltriphenylphosphonium bromide (481 mg, 1.10 mmol) was added *n*-BuLi (1.60 M in hexane, 0.76 mL, 1.2 mmol) at  $-78\text{ }^{\circ}\text{C}$ . After stirring for 5 min at  $-78\text{ }^{\circ}\text{C}$ , the reaction mixture was warmed to  $0\text{ }^{\circ}\text{C}$ . After stirring for another 1 h at  $0\text{ }^{\circ}\text{C}$ , the reaction mixture was then cooled to  $-78\text{ }^{\circ}\text{C}$ . To the mixture was added a tetrahydrofuran solution (4 mL) of 2,2,2-trifluoroacetophenone (**6**, 174 mg, 1.0 mmol) via cannula over 3 min at  $-78\text{ }^{\circ}\text{C}$ . After being stirred for 1 h at  $-78\text{ }^{\circ}\text{C}$ , for 1 h at  $0\text{ }^{\circ}\text{C}$ , and for 1 h at room temperature, the reaction was quenched with saturated aqueous  $\text{NH}_4\text{Cl}$ . Organic materials were extracted with  $\text{Et}_2\text{O}$  two times. The combined extracts were washed with brine and dried over  $\text{Na}_2\text{SO}_4$ . After removal of the solvent under reduced pressure, the residue was purified by silica gel column chromatography (hexane) to give enyne **8** (220 mg, 87%,  $E/Z$  = 64:36) as a colorless liquid.

**8:** IR (neat):  $\tilde{\nu}$  = 3309, 2941, 2864, 1302, 1169, 1113, 758, 700, 633  $\text{cm}^{-1}$ .

**E-8:**  $^1\text{H}$  NMR:  $\delta$  1.35–1.47 (m, 4H), 1.84 (t,  $J$  = 2.5 Hz, 1H), 1.91–1.97 (m, 2H), 2.04 (td,  $J$  = 6.5, 2.5 Hz, 2H), 6.33 (tq,  $J$  = 6.8 Hz,  $J_{\text{HF}}$  = 1.6 Hz, 1H), 7.14–7.16 (m, 2H), 7.28–7.33 (m, 3H).  $^{13}\text{C}$  NMR:  $\delta$  18.1, 27.70, 27.70, 27.72, 68.5, 83.9, 123.5 (q,  $J_{\text{CF}}$  = 273 Hz), 128.2, 128.4, 129.7, 131.5 (q,  $J_{\text{CF}}$  = 29 Hz), 132.3, 136.2 (q,  $J_{\text{CF}}$  = 5 Hz).  $^{19}\text{F}$  NMR:  $\delta$  96.0 (s). HRMS (EI+): Calcd for  $\text{C}_{15}\text{H}_{15}\text{F}_3$   $[\text{M}]^+$  252.1126, Found: 252.1112.

**Z-8:**  $^1\text{H}$  NMR:  $\delta$  1.49–1.58 (m, 4H), 1.88 (t,  $J$  = 3.0 Hz, 1H), 2.15 (td,  $J$  = 6.0, 3.0 Hz, 2H), 2.36–2.41 (m, 2H), 5.93 (t,  $J$  = 7.8 Hz, 1H), 7.20–7.22 (m, 2H), 7.25–7.28 (m, 3H).  $^{13}\text{C}$  NMR:  $\delta$  18.2, 27.7, 27.9, 28.2, 68.5, 84.0, 123.9 (q,  $J_{\text{CF}}$  = 276 Hz), 128.0, 128.2, 128.4, 131.9 (q,  $J_{\text{CF}}$  = 30 Hz), 136.6 (q,  $J_{\text{CF}}$  = 2 Hz), 141.6 (q,  $J_{\text{CF}}$  = 3 Hz).  $^{19}\text{F}$  NMR:  $\delta$  104.6 (s). HRMS (EI+): Calcd for  $\text{C}_{15}\text{H}_{15}\text{F}_3$   $[\text{M}]^+$  252.1126, Found: 252.1122.

**(iii) 1,1,1-Trifluoro-2-phenyldec-2-en-8-yne (5)**

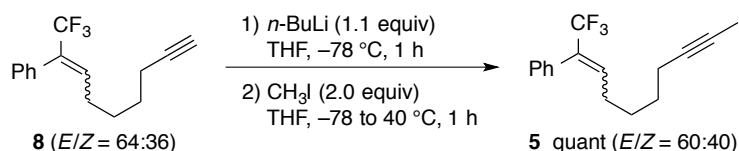

To a tetrahydrofuran solution (10 mL) of enyne **8** (251 mg, 0.994 mmol) was added *n*-BuLi (1.60 M in hexane, 0.68 mL, 1.1 mmol) at -78 °C. After stirring for 1 h at -78 °C, iodomethane (0.12 mL, 2.0 mmol) was added to the reaction mixture. The mixture was then warmed to 40 °C and stirred for 1 h. The reaction was quenched with saturated aqueous NH<sub>4</sub>Cl. Organic materials were extracted with Et<sub>2</sub>O two times. The combined extracts were washed with brine and dried over Na<sub>2</sub>SO<sub>4</sub>. After removal of the solvent under reduced pressure, the residue was purified by silica gel column chromatography (hexane) to give 1,1,1-trifluorodec-2-en-8-yne **5** (265 mg, quant, *E/Z* = 60:40) as a colorless liquid.

**5**: IR (neat):  $\tilde{\nu}$  = 2935, 2862, 1302, 1169, 1117, 912, 737, 702 cm<sup>-1</sup>.

**E-5**: <sup>1</sup>H NMR:  $\delta$  1.31–1.37 (m, 2H), 1.39–1.45 (m, 2H), 1.69 (t, *J* = 2.5 Hz, 3H), 1.91–2.01 (m, 4H), 6.35 (tq, *J* = 7.5 Hz, *J*<sub>HF</sub> = 1.6 Hz, 1H), 7.15–7.16 (m, 2H), 7.29–7.33 (m, 3H). <sup>13</sup>C NMR:  $\delta$  3.4, 18.4, 27.8, 27.9, 28.3, 75.7, 78.6, 123.5 (q, *J*<sub>CF</sub> = 273 Hz), 128.33, 128.34, 129.7, 131.3 (q, *J*<sub>CF</sub> = 29 Hz), 132.4, 136.4 (q, *J*<sub>CF</sub> = 6 Hz). <sup>19</sup>F NMR:  $\delta$  96.0 (s). HRMS (EI<sup>+</sup>): Calcd for C<sub>15</sub>H<sub>14</sub>F<sub>3</sub> [M–CH<sub>3</sub>]<sup>+</sup> 251.1048, Found: 251.1059.

**Z-5**: <sup>1</sup>H NMR:  $\delta$  1.46–1.56 (m, 4H), 1.71 (t, *J* = 2.5 Hz, 3H), 2.08–2.12 (m, 2H), 2.35–2.41 (m, 2H), 5.95 (t, *J* = 7.8 Hz, 1H), 7.21–7.23 (m, 2H), 7.25–7.29 (m, 3H). <sup>13</sup>C NMR:  $\delta$  3.4, 18.5, 28.3, 28.4, 28.5, 75.8, 78.7, 124.0 (q, *J*<sub>CF</sub> = 276 Hz), 127.9, 128.15, 128.18, 131.7 (q, *J*<sub>CF</sub> = 30 Hz), 136.6, 141.9 (q, *J*<sub>CF</sub> = 3 Hz). <sup>19</sup>F NMR:  $\delta$  104.6 (s). HRMS (EI<sup>+</sup>): Calcd for C<sub>15</sub>H<sub>14</sub>F<sub>3</sub> [M–CH<sub>3</sub>]<sup>+</sup> 251.1048, Found: 251.1053.

**Nickel-Catalyzed Intermolecular [3+2] Cycloaddition of 1-Trifluoromethyl-1-en-7-yne 5**

**2-Fluoro-3-methyl-1-phenyl-5,6,7,7a-tetrahydro-4H-indene (9)**

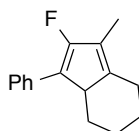

In a 30-mL Schlenk tube were placed Ni(cod)<sub>2</sub> (14 mg, 0.051 mmol), PCy<sub>3</sub> (29 mg, 0.10 mmol), B<sub>2</sub>(nep)<sub>2</sub> (62 mg, 0.27 mmol), *t*-BuOK (30 mg, 0.27 mmol), MgF<sub>2</sub> (16 mg, 0.26 mmol), and 1,4-dioxane (3 mL). After stirring for 10 min at room temperature, 1-trifluoromethyl-1-en-7-yne **5** (67 mg, 0.25 mmol) was added to the mixture. After stirring for 3 h at 80 °C, the reaction was quenched with saturated aqueous NH<sub>4</sub>Cl. Organic materials were extracted with CH<sub>2</sub>Cl<sub>2</sub> two times. The combined extracts were washed with brine and dried over Na<sub>2</sub>SO<sub>4</sub>. After removal of the solvent under reduced pressure, the residue was purified by silica gel column chromatography (hexane) to give 2-fluoro-5,6,7,7a-tetrahydro-4H-indene **9** (29 mg, 51%) as a white solid.

**9**: IR (neat):  $\tilde{\nu}$  = 2933, 2856, 906, 731, 650  $\text{cm}^{-1}$ .  $^1\text{H}$  NMR:  $\delta$  0.84 (dddd,  $J$  = 13.2, 13.2, 13.2, 3.3 Hz, 1H), 1.16–1.25 (m, 1H), 1.45–1.54 (m, 1H), 1.77–1.83 (m, 1H), 1.87 (t,  $J_{\text{HF}}$  = 1.5 Hz, 3H), 1.97–2.03 (m, 1H), 2.09–2.16 (m, 1H), 2.37–2.42 (m, 1H), 2.69–2.73 (m, 1H), 2.96–3.01 (m, 1H), 7.14 (tt,  $J$  = 7.5, 1.0 Hz, 1H), 7.33 (dd,  $J$  = 7.5, 7.5 Hz, 2H), 7.46 (dd,  $J$  = 7.5, 1.0 Hz, 2H).  $^{13}\text{C}$  NMR:  $\delta$  8.5, 25.5, 26.2 (d,  $J_{\text{CF}}$  = 2 Hz), 29.1, 33.4 (d,  $J_{\text{CF}}$  = 3 Hz), 47.1 (d,  $J_{\text{CF}}$  = 8 Hz), 118.3, 124.6 (d,  $J_{\text{CF}}$  = 28 Hz), 125.4 (d,  $J_{\text{CF}}$  = 2 Hz), 126.3 (d,  $J_{\text{CF}}$  = 6 Hz), 128.5, 133.1 (d,  $J_{\text{CF}}$  = 5 Hz), 144.5 (d,  $J_{\text{CF}}$  = 6 Hz), 159.0 (d,  $J_{\text{CF}}$  = 281 Hz).  $^{19}\text{F}$  NMR:  $\delta$  33.8 (d,  $J_{\text{FH}}$  = 6 Hz). HRMS (EI<sup>+</sup>): Calcd for  $\text{C}_{16}\text{H}_{17}\text{F} [\text{M}]^+$  228.1314, Found: 228.1323.

## References

- (1) A. Altomare, M. C. Burla, M. Camalli, G. L. Cascarano, C. Giacovazzo, A. Guagliardi, A. G. G. Moliterni, G. Polidori and R. Spagna, *J. Appl. Crystallogr.*, 1999, **32**, 115–119.
- (2) G. M. Sheldrick, *Programs for Crystal Structure Analysis (Release 972)*; Institut für Anorganische Chemie der Universität: Göttingen, Germany, 1998.
- (3) (a) B. Jiang, Q.-F. Wang, C.-G. Yang and M. Xu, *Tetrahedron Lett.*, 2001, **42**, 4083–4085; (b) J. Walkowiak, T. M. del Campo, B. Ameduri and V. Gouverneur, *Synthesis*, 2010, **11**, 1883–1890.
- (4) J. R. Coombs, L. Zhang and J. P. Morken, *J. Am. Chem. Soc.*, 2014, **136**, 16140–16143.
- (5) T. Ichitsuka, T. Fujita, T. Arita and J. Ichikawa, *Angew. Chem., Int. Ed.*, 2014, **53**, 7564–7568.



# $^1\text{H}$ , $^{13}\text{C}$ , and $^{19}\text{F}$ NMR Spectra

## 1-Fluoro-3-[2-fluoro-3-methyl-4-(propan-2-yl)cyclopenta-1,3-dien-1-yl]benzene (3bb)

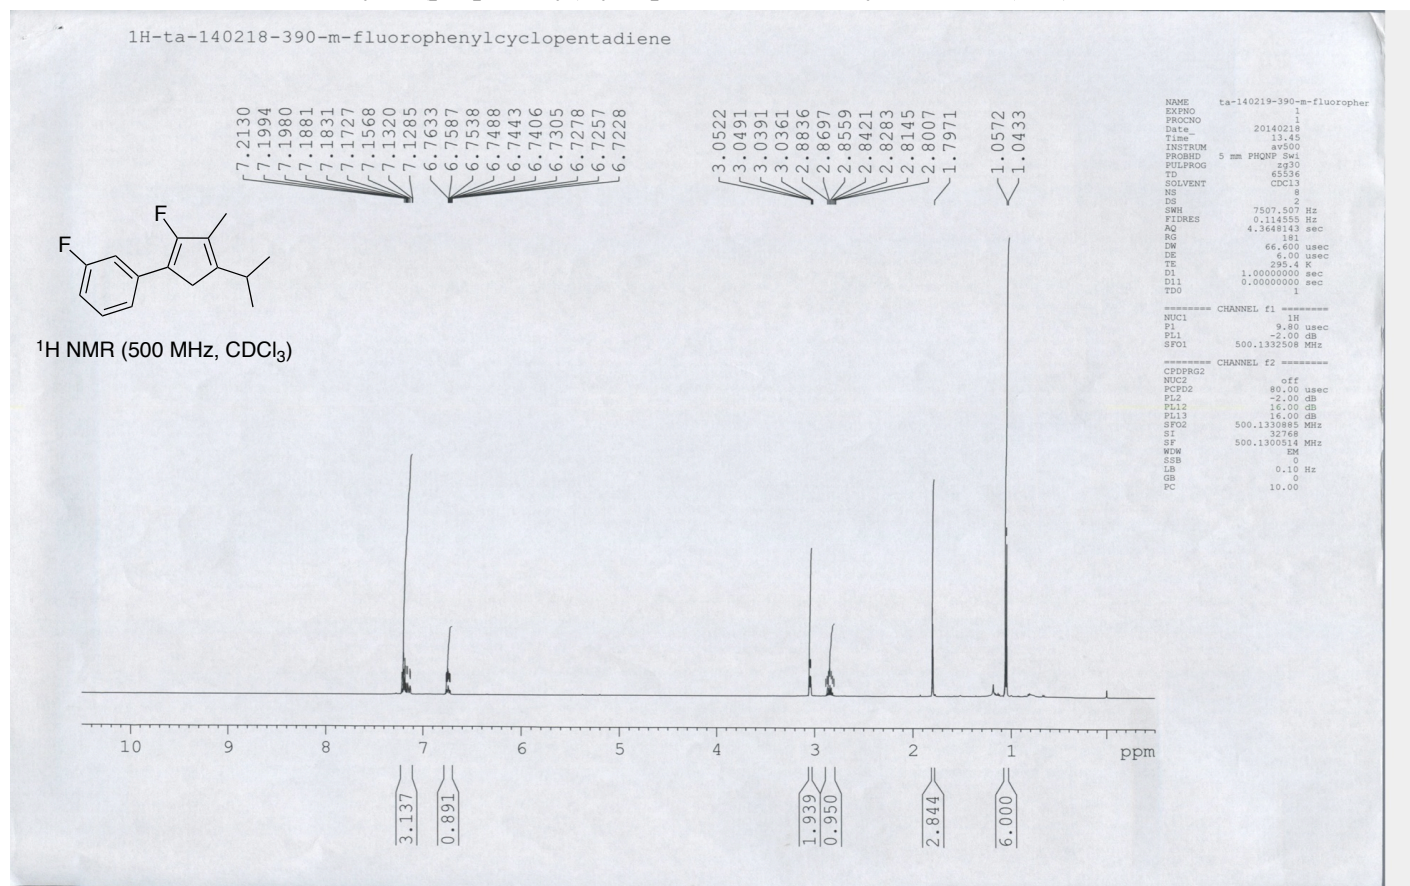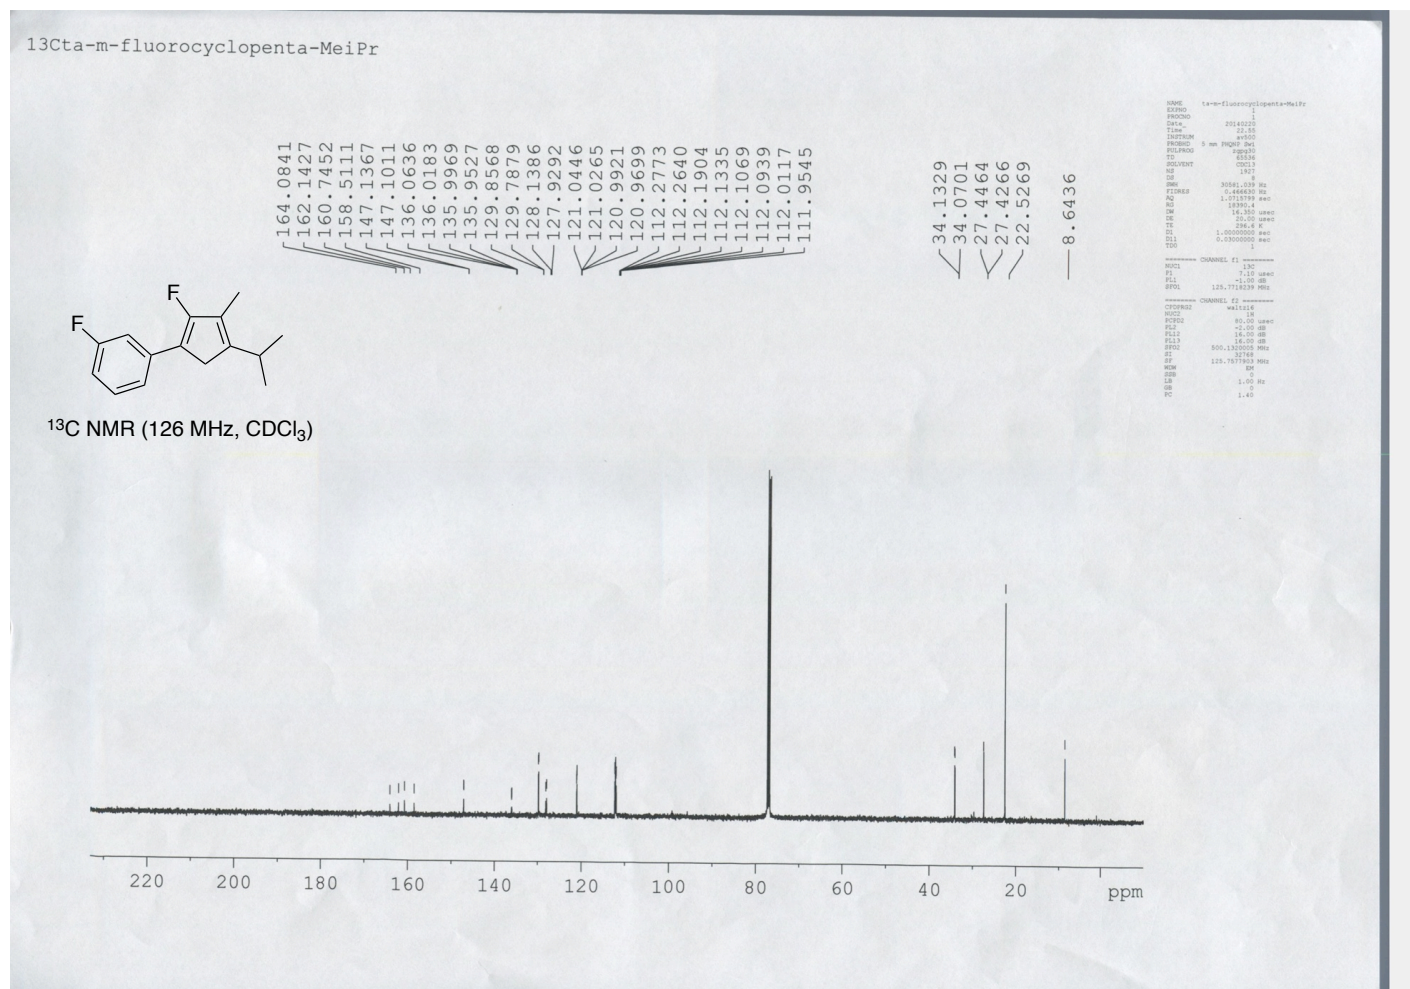



19Fta-150528-m-F

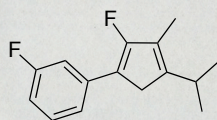

<sup>19</sup>F NMR (470 MHz, CDCl<sub>3</sub>)

48.1250  
48.1151  
48.1064  
48.0939  
48.0850  
48.0722  
38.8818  
38.8671  
38.8538

```
NAME      ta-150528-m-F
EXPNO     1
PROCNO    1
Date_     20150528
Time      20.01
INSTRUM   av500
PROBHD    5 mm PHONP SW1
PULPROG   zgpg30
TD         184320
SOLVENT   CDCl3
NS         8
DS         4
SWH        94339.625 Hz
FIDRES     0.311825 Hz
AQ         0.9769513 sec
RG         374.71
DW         5.300 usec
DE         6.00 usec
TE         295.4 K
D1         10.00000000 sec
TDO        1
```

```
===== CHANNEL f1 =====
NUC1       19F
P1         4.60 usec
PL1        -1.00 dB
SFO1       470.5387490 MHz
SI         65536
SF         470.5162886 MHz
WDW        EM
SSB        0
LB         1.00 Hz
GB         0
PC         3.00
```

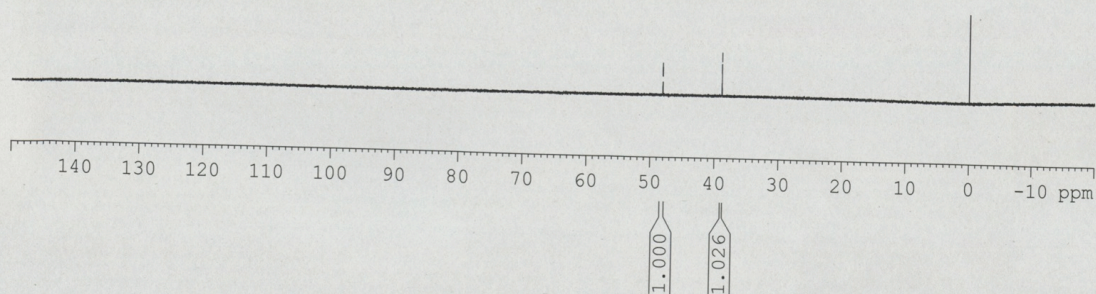

#### 4-[2-Fluoro-3-methyl-4-(propan-2-yl)cyclopenta-1,3-dien-1-yl]benzonitrile (3cb)

1Hta-150427-Ph-CN

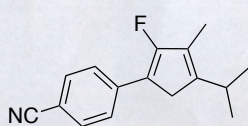

<sup>1</sup>H NMR (500 MHz, CDCl<sub>3</sub>)

7.5698

3.1615  
3.1585  
3.1481  
3.1451  
2.9827  
2.9682  
2.9545  
2.9405  
2.9268  
2.9132  
2.8991  
1.8850  
1.1426  
1.1288

```
NAME      ta-150427-Ph-CN
EXPNO     1
PROCNO    1
Date_     20150427
Time      23.20
INSTRUM   av500
PROBHD    5 mm PHONP SW1
PULPROG   zg30
TD         65536
SOLVENT   CDCl3
NS         8
DS         2
SWH        7507.507 Hz
FIDRES     0.114555 Hz
AQ         4.3648143 sec
RG         362
DW         66.600 usec
DE         6.00 usec
TE         295.3 K
D1         1.00000000 sec
TDO        1
```

```
===== CHANNEL f1 =====
NUC1       1H
P1         9.80 usec
PL1        -2.00 dB
SFO1       500.1332508 MHz
SI         32768
SF         500.1300129 MHz
WDW        EM
SSB        0
LB         0.10 Hz
GB         0
PC         10.00
```

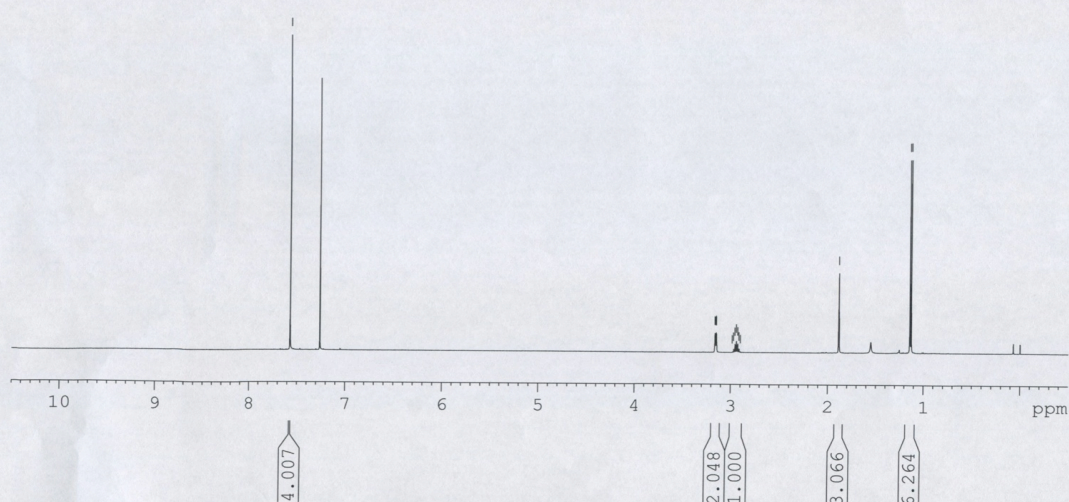



a-140221-391-cyclopent-CN-M

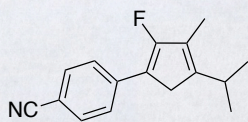

$^{13}\text{C}$  NMR (126 MHz,  $\text{CDCl}_3$ )

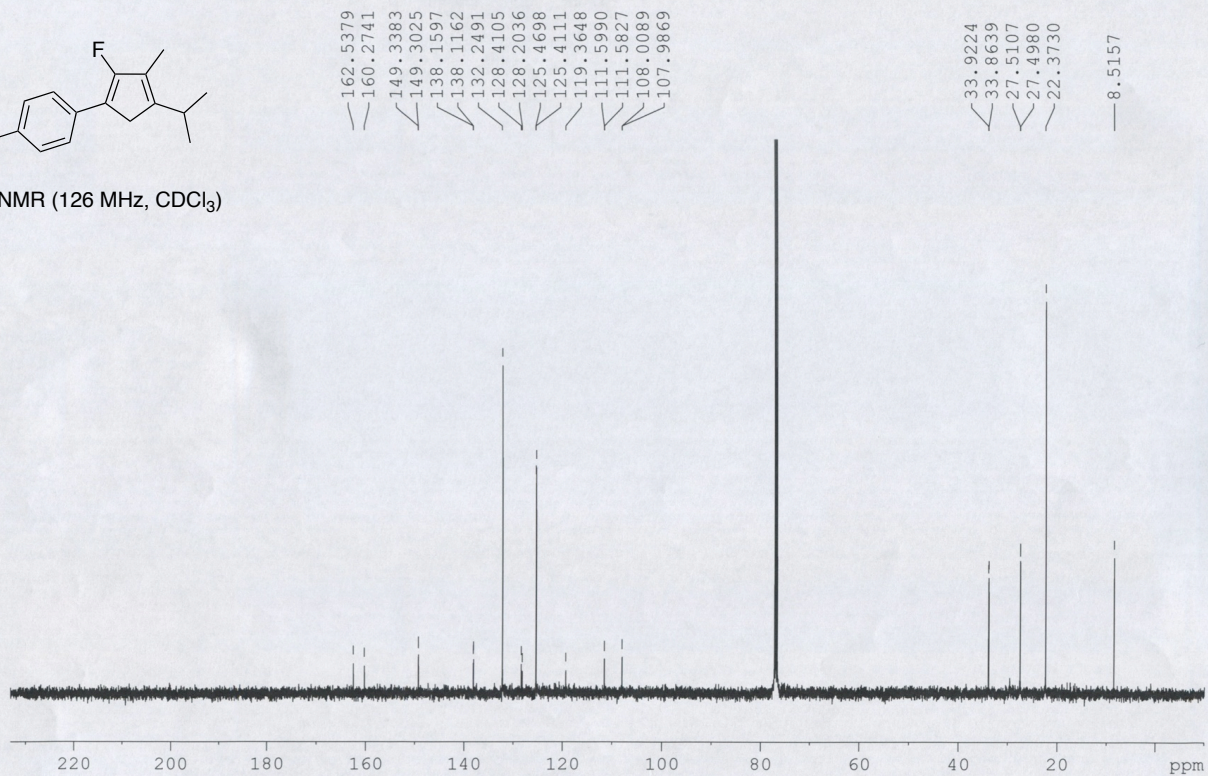

19Fta-150530-CF3-CN

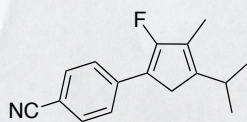

$^{19}\text{F}$  NMR (470 MHz,  $\text{CDCl}_3$ )

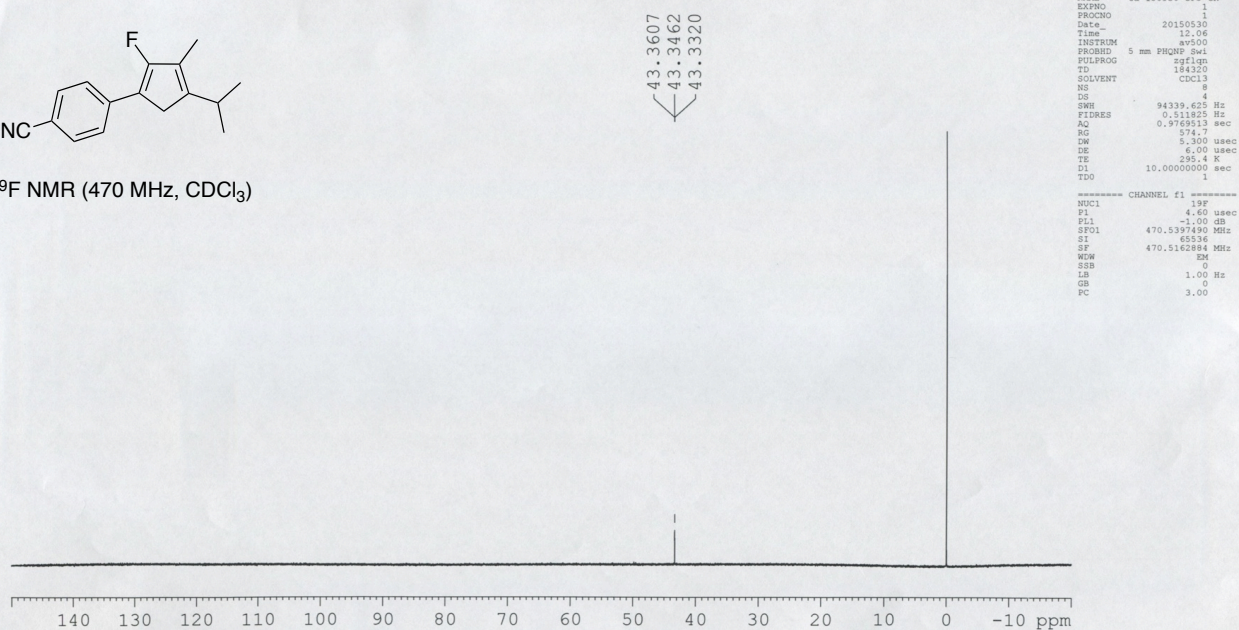



**1-[2-Fluoro-3-methyl-4-(propan-2-yl)cyclopenta-1,3-dien-1-yl]-3-(trifluoromethyl)benzene (3db)**

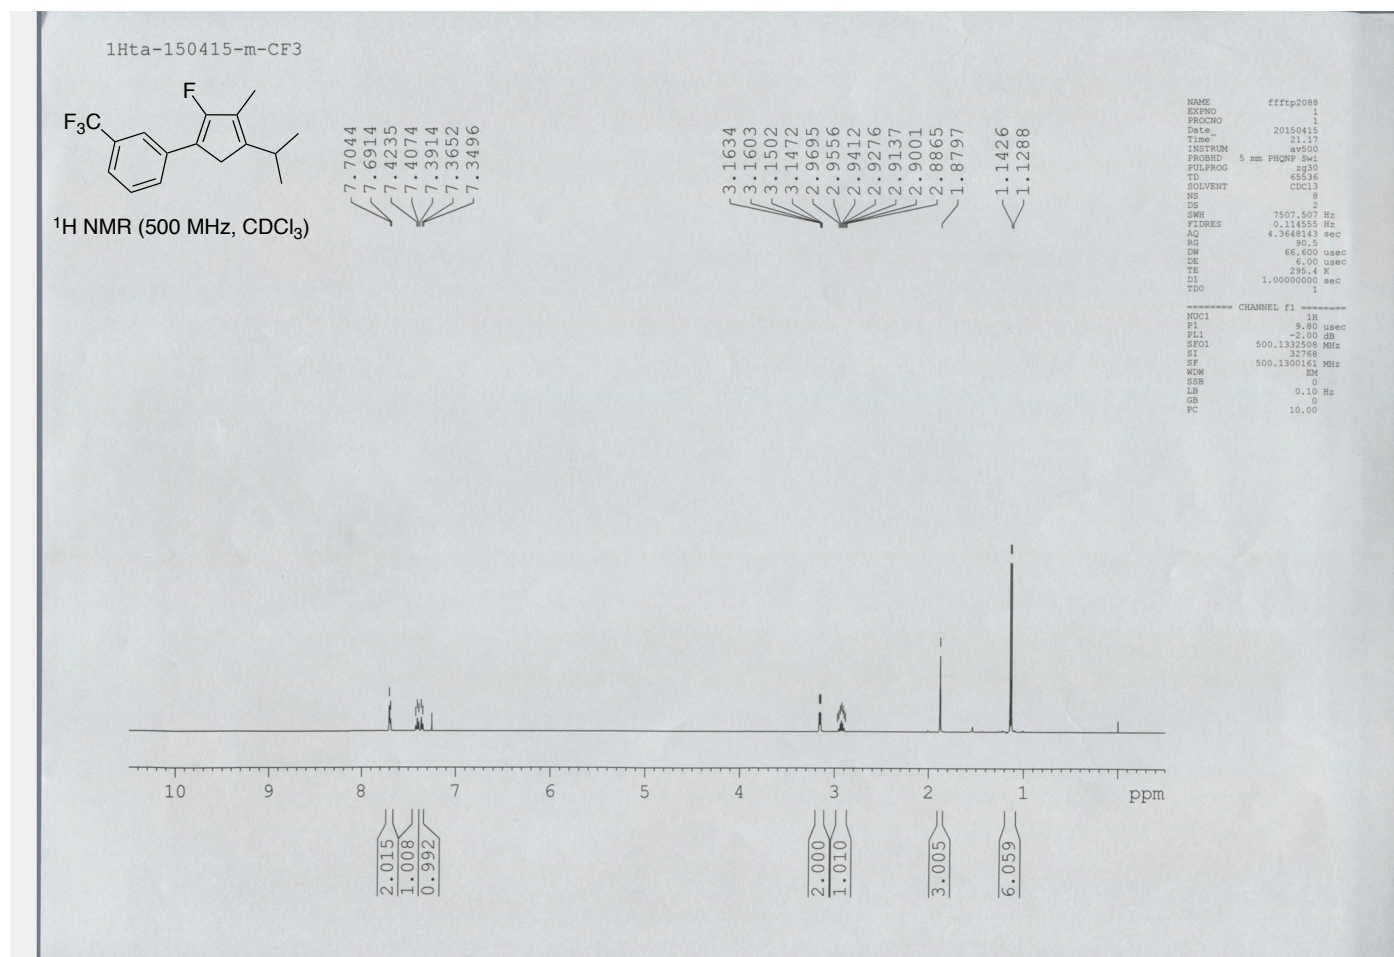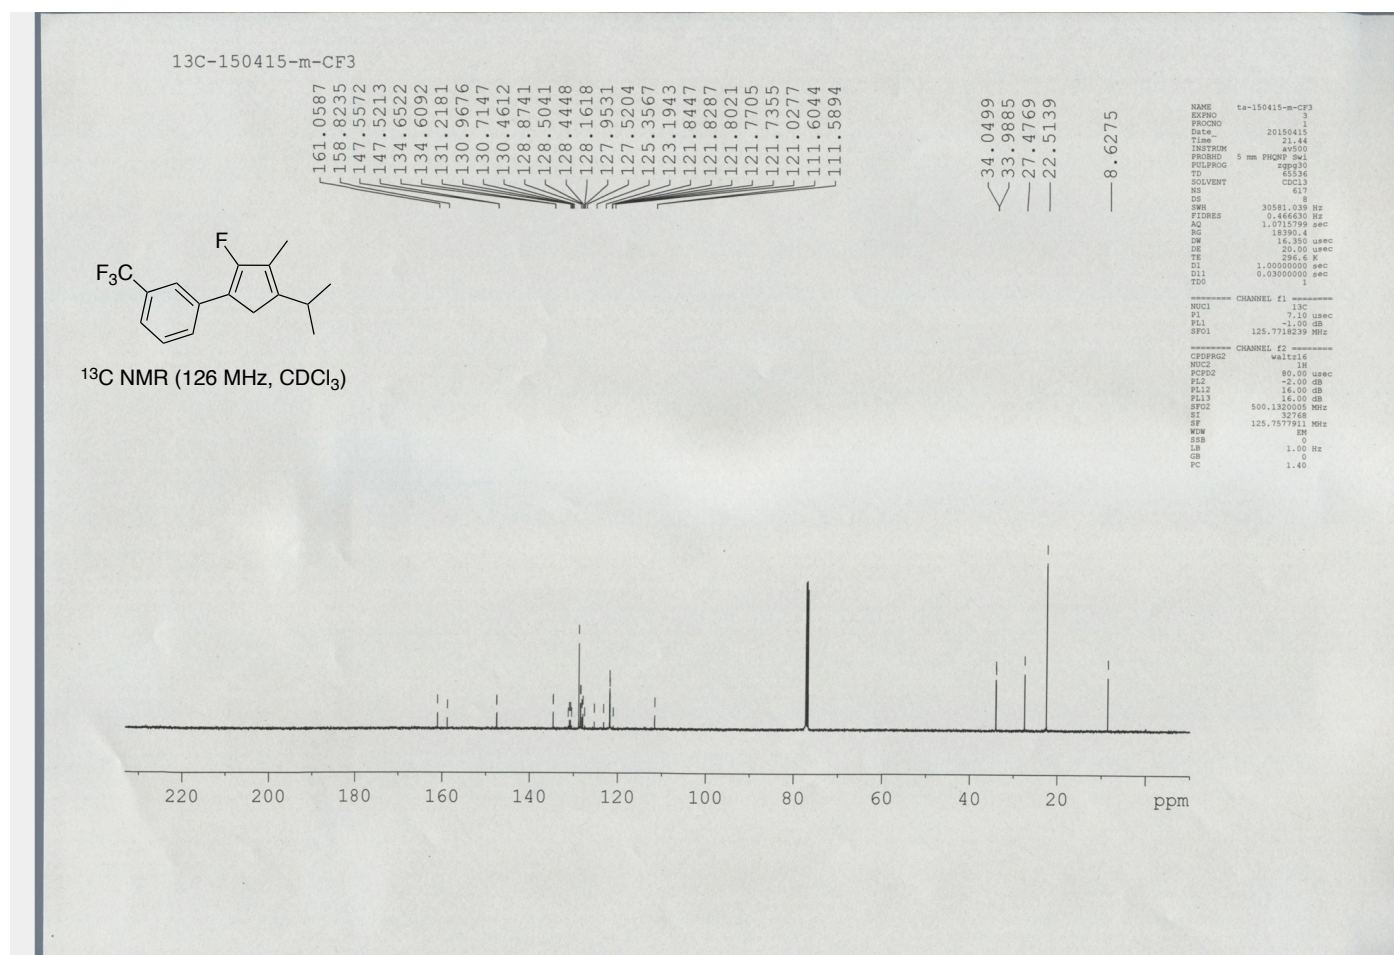



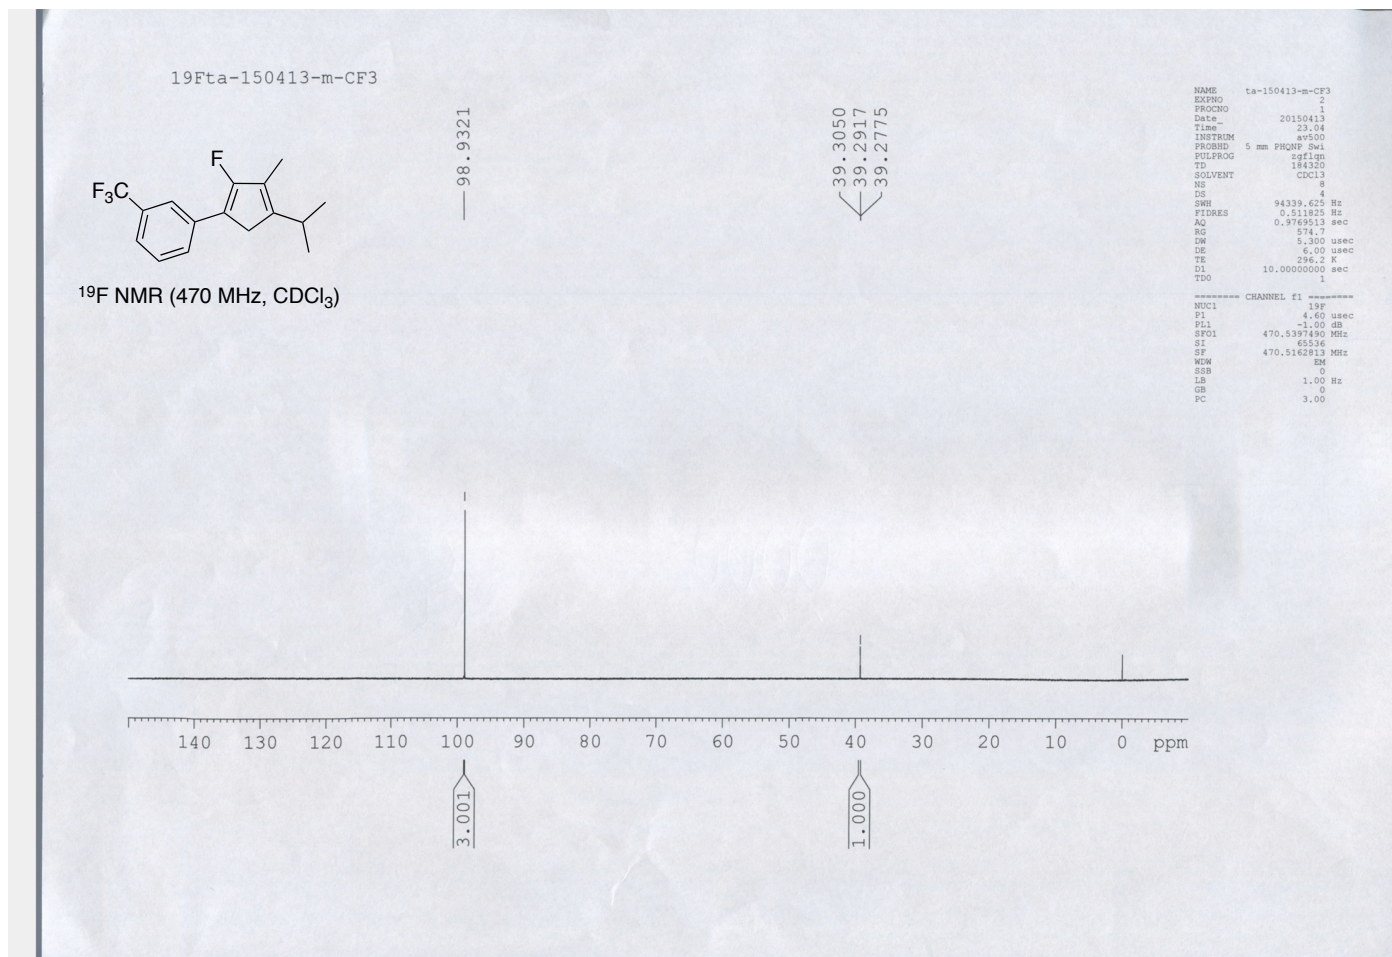

#### 4-[2-Fluoro-3-methyl-4-(propan-2-yl)cyclopenta-1,3-dien-1-yl]-1,1'-biphenyl (3fb)

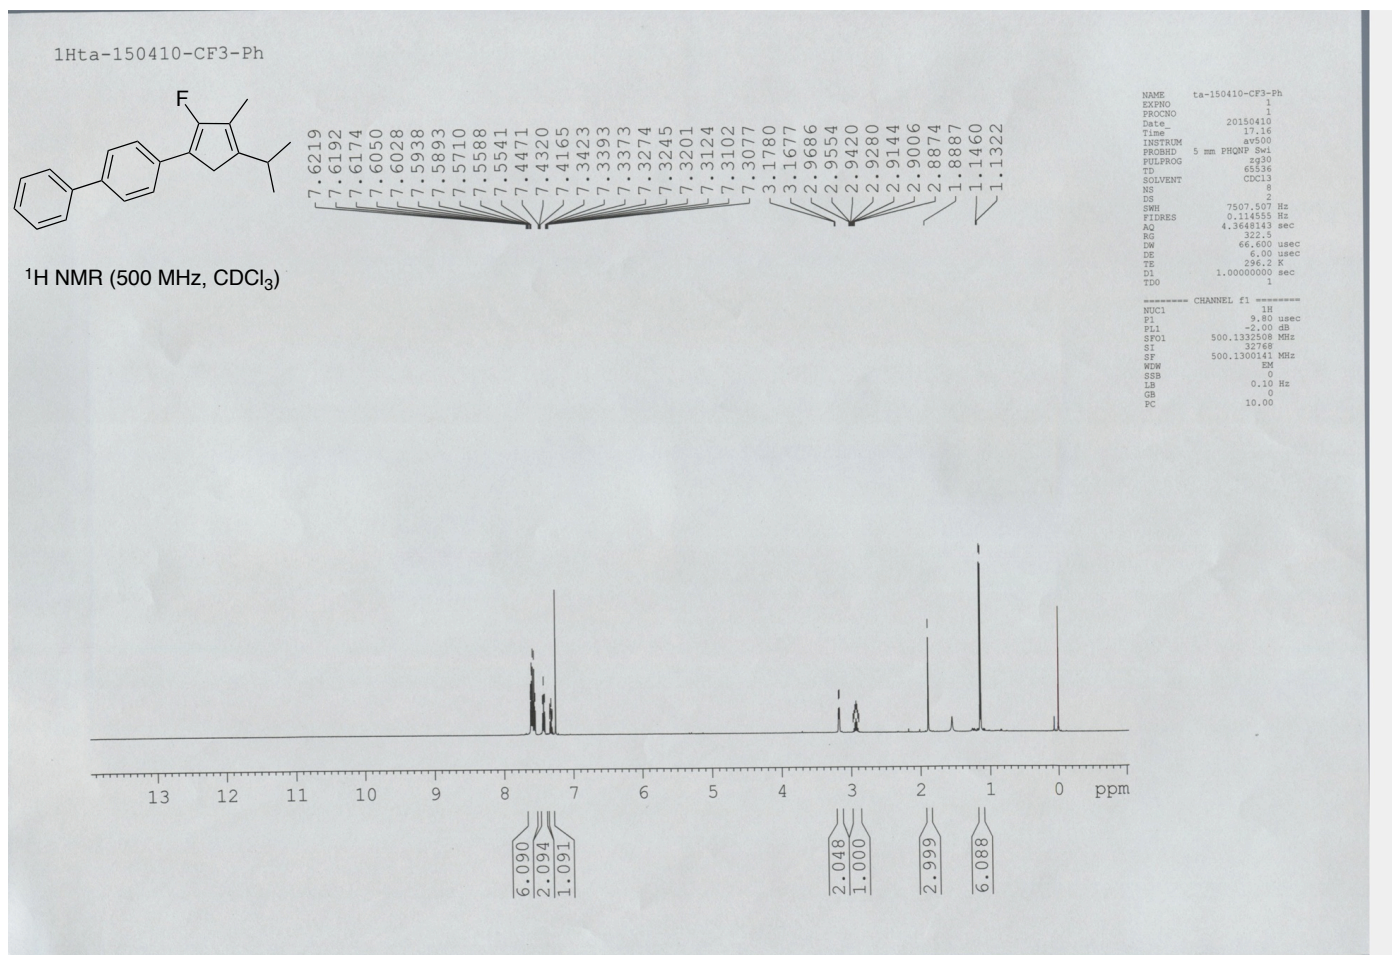



13Cta-150410-CF3-Ph

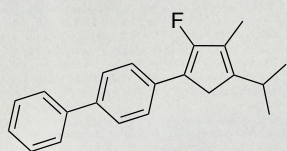

<sup>13</sup>C NMR (126 MHz, CDCl<sub>3</sub>)

160.2025  
157.9760  
146.4954  
146.4595  
140.8849  
138.0137  
133.0140  
128.7316  
128.2122  
128.0055  
127.1214  
127.0169  
126.7798  
125.8430  
125.7901  
112.5002  
112.4777

34.1181  
34.0537  
27.4558  
27.4418  
22.5862  
8.7134

```
NAME      ta-150410-CF3-Ph
EXPNO     1
PROCNO     1
Date_      20150410
Time       18:14
INSTRUM    av500
PROBHD     5 mm PQNP Swi
PULPROG    zgpg30
TD          65536
SOLVENT     CDCl3
NS          480
DS          8
SWH         30881.039 Hz
FIDRES      0.466430 Hz
AQ          1.0715799 sec
RG          18390.4
DW          16.350 usec
DE          20.00 usec
TE          296.7 K
D1          1.00000000 sec
D11         0.03000000 sec
TDO         1

===== CHANNEL f1 =====
NUC1        13C
P1          7.10 usec
PL1         -1.00 dB
SFO1        125.7718239 MHz

===== CHANNEL f2 =====
CPDPRG2     waltz16
NUC2         1H
PCPD2       80.00 usec
PL2          -2.00 dB
PL12        16.00 dB
PL13        16.00 dB
SFO2        500.1362005 MHz
SI          32768
SF          125.7577912 MHz
WDW          EM
SSB          0
LB          1.00 Hz
GB          0
PC          1.40
```

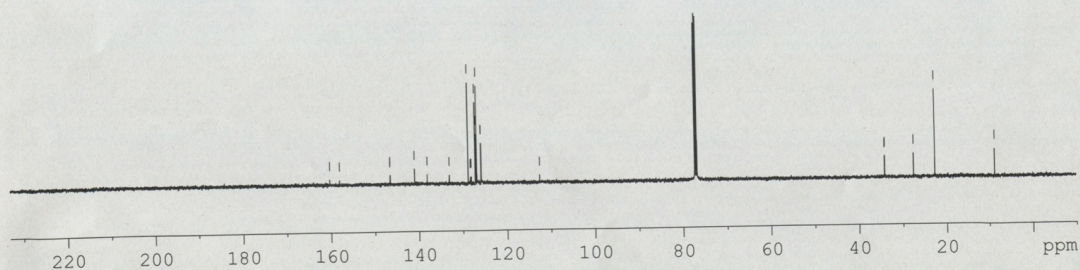

19Fta-1550406-CF3-Ph

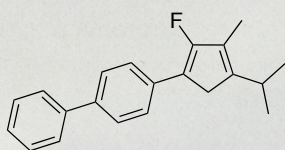

<sup>19</sup>F NMR (470 MHz, CDCl<sub>3</sub>)

37.2900  
37.2763  
37.2636

```
NAME      ta-1550406-CF3-Ph
EXPNO     1
PROCNO     1
Date_      20150406
Time       14:15
INSTRUM    av500
PROBHD     5 mm PQNP Swi
PULPROG    zgpg30
TD          164320
SOLVENT     CDCl3
NS          8
DS          4
SWH         94339.625 Hz
FIDRES      0.511825 Hz
AQ          0.9769512 sec
RG          574.7
DW          5.300 usec
DE          6.00 usec
TE          296.2 K
D1          10.00000000 sec
TDO         1

===== CHANNEL f1 =====
NUC1        19F
P1          4.60 usec
PL1         -1.00 dB
SFO1        470.5374900 MHz
SI          65536
SF          470.5162843 MHz
WDW          EM
SSB          0
LB          1.00 Hz
GB          0
PC          3.00
```

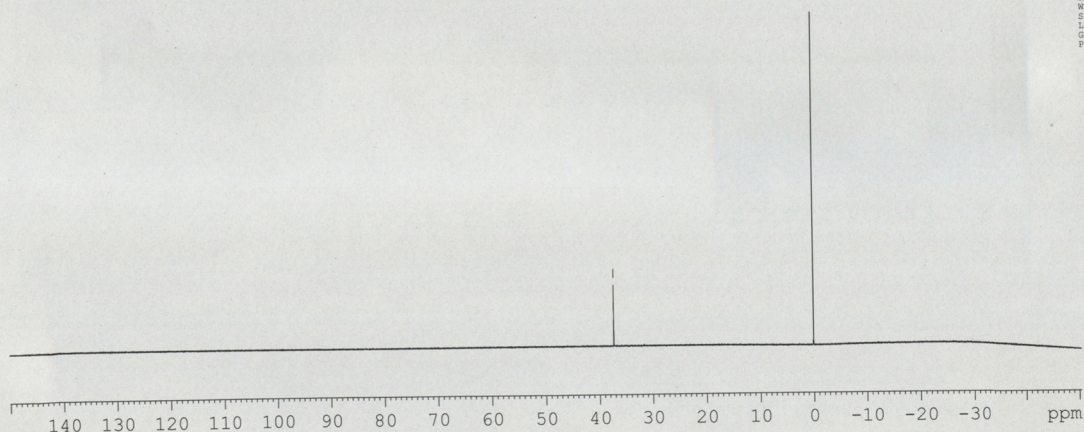



# Hept-6-yn-1-yltriphenylphosphonium bromide

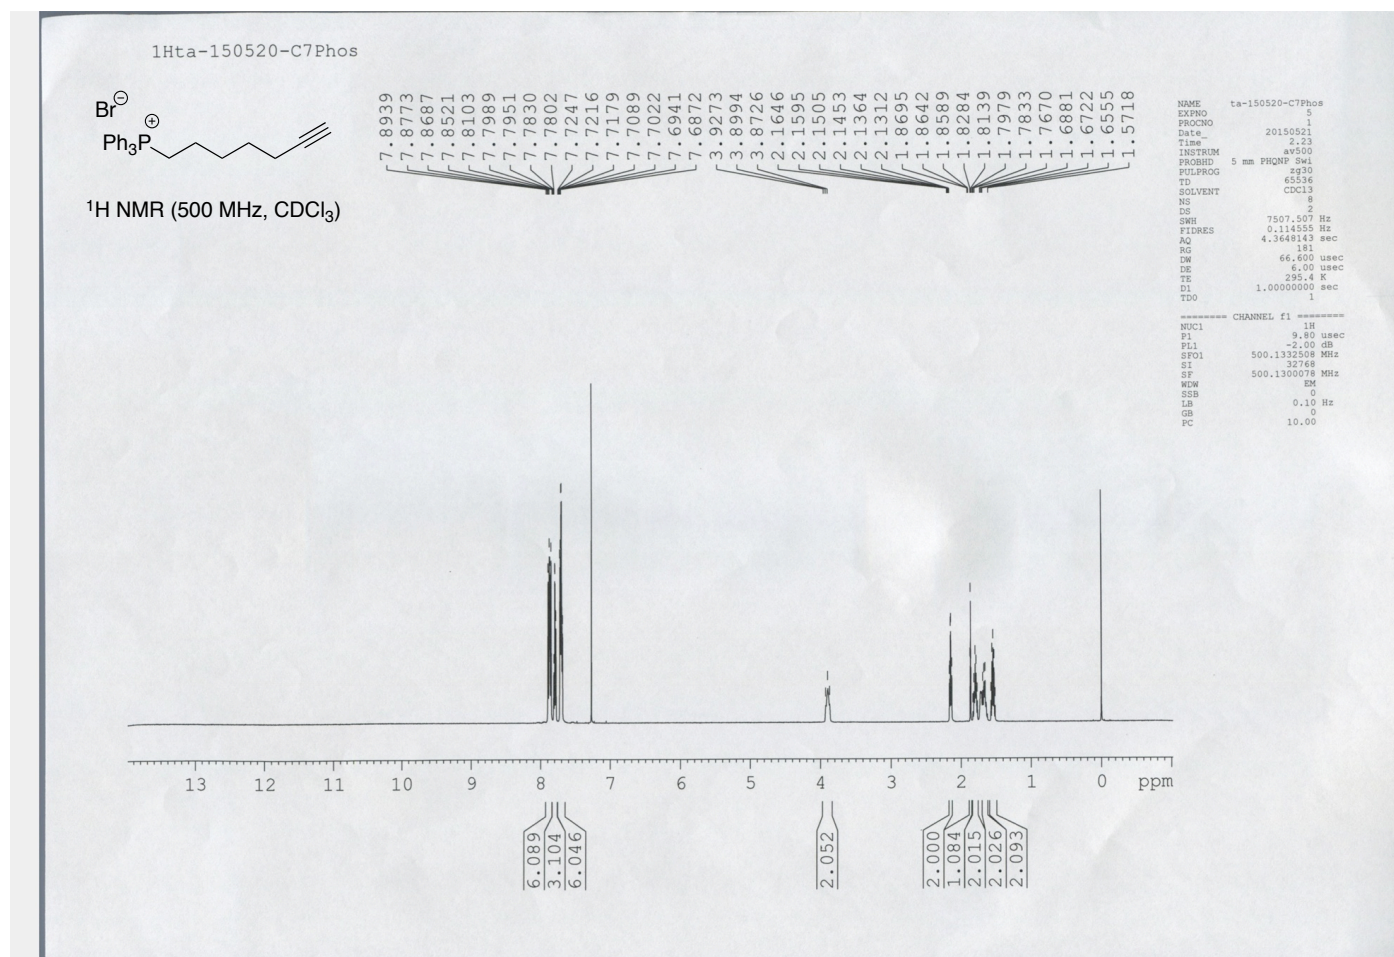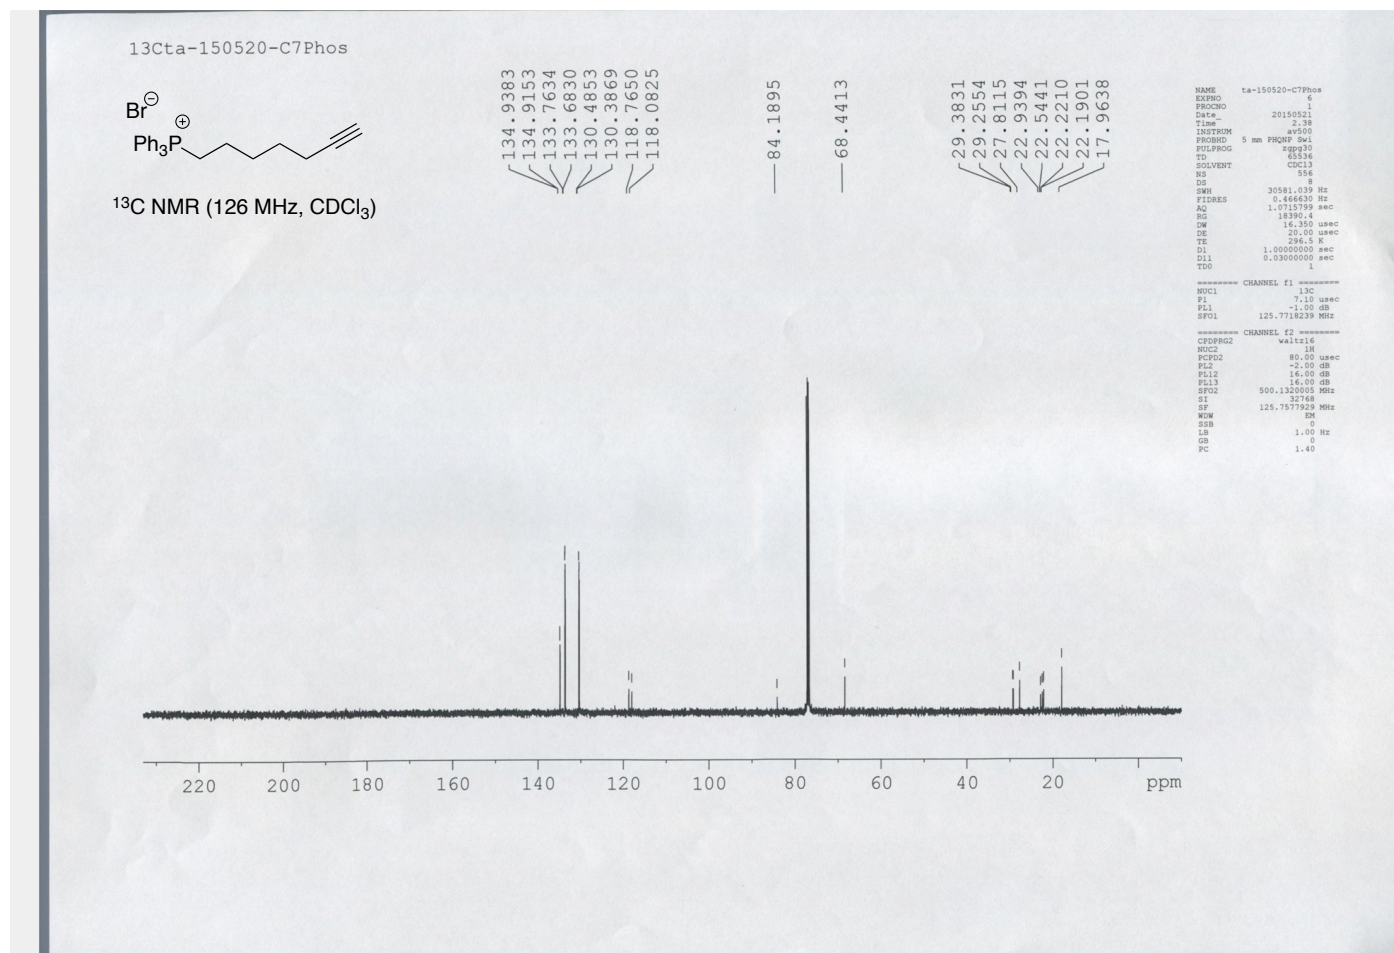



**(E)-1,1,1-Trifluoro-2-phenylnon-2-en-8-yne (8)**

**(Z)-1,1,1-Trifluoro-2-phenylnon-2-en-8-yne (8)**

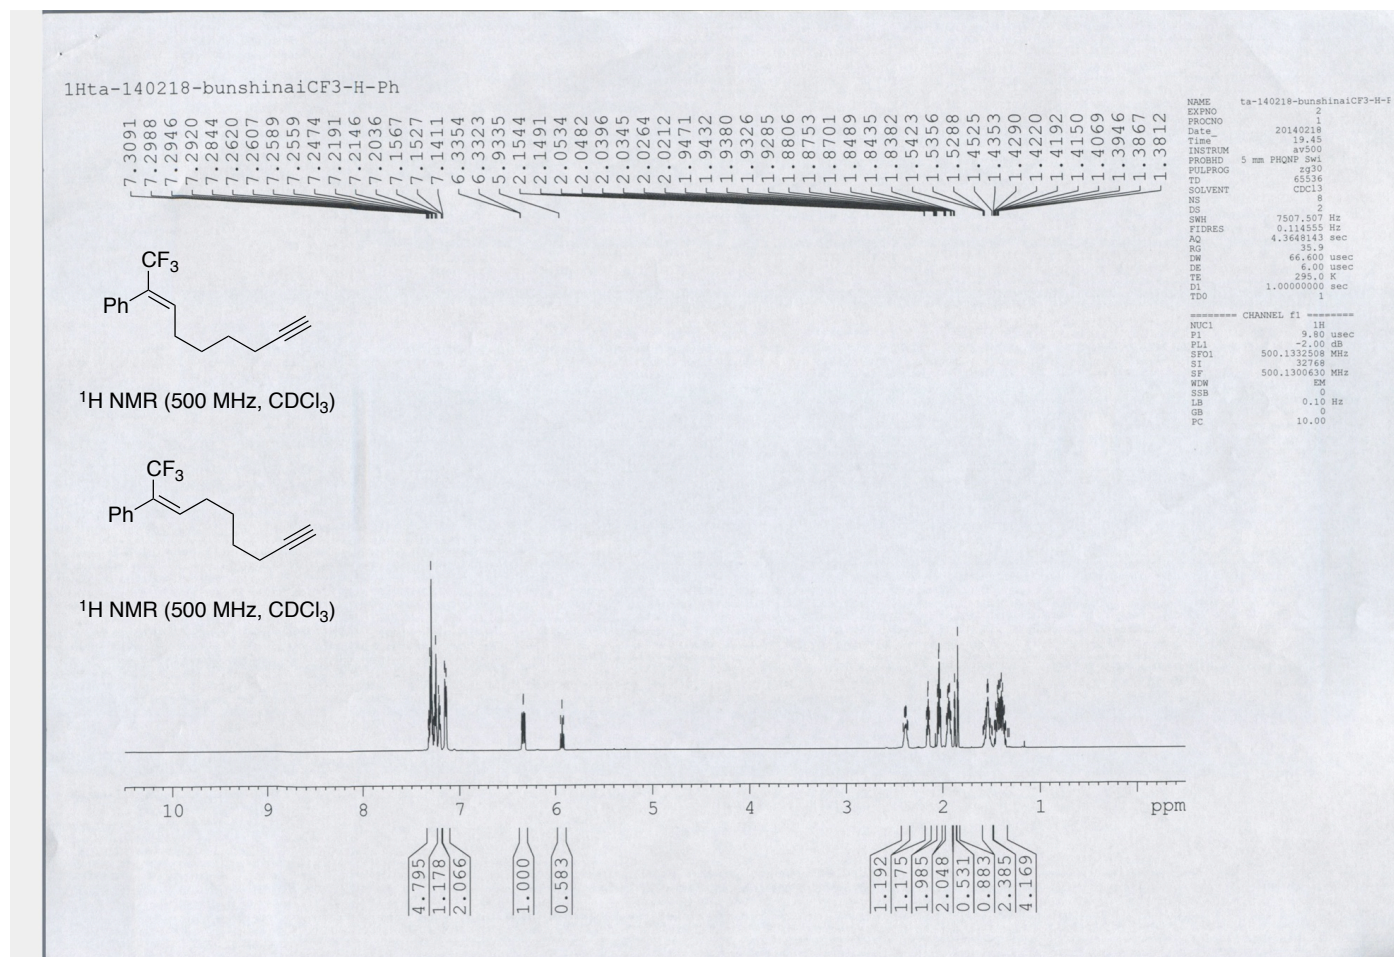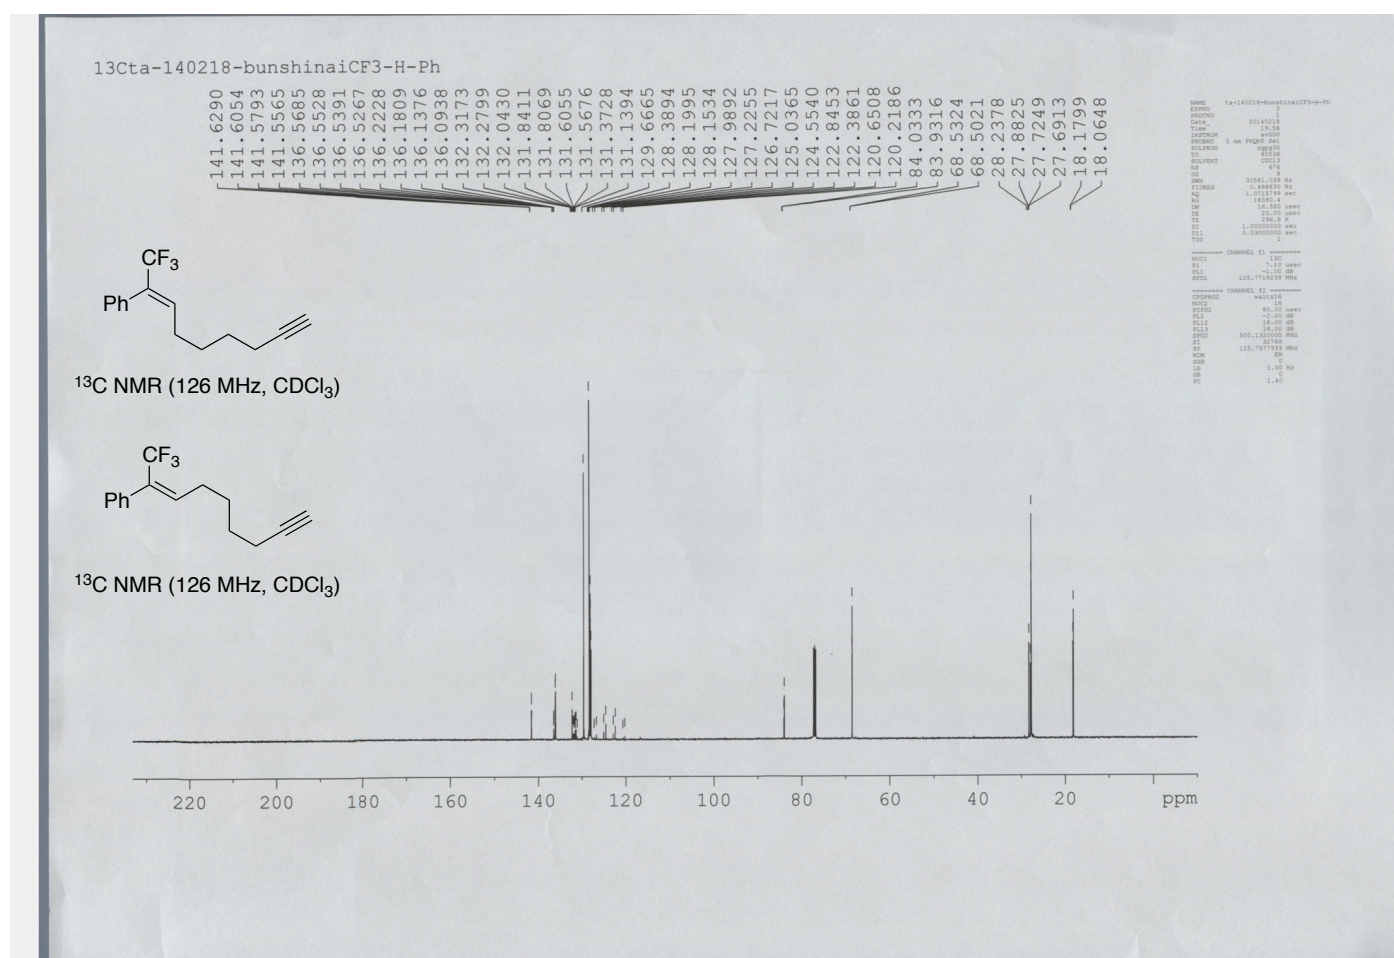



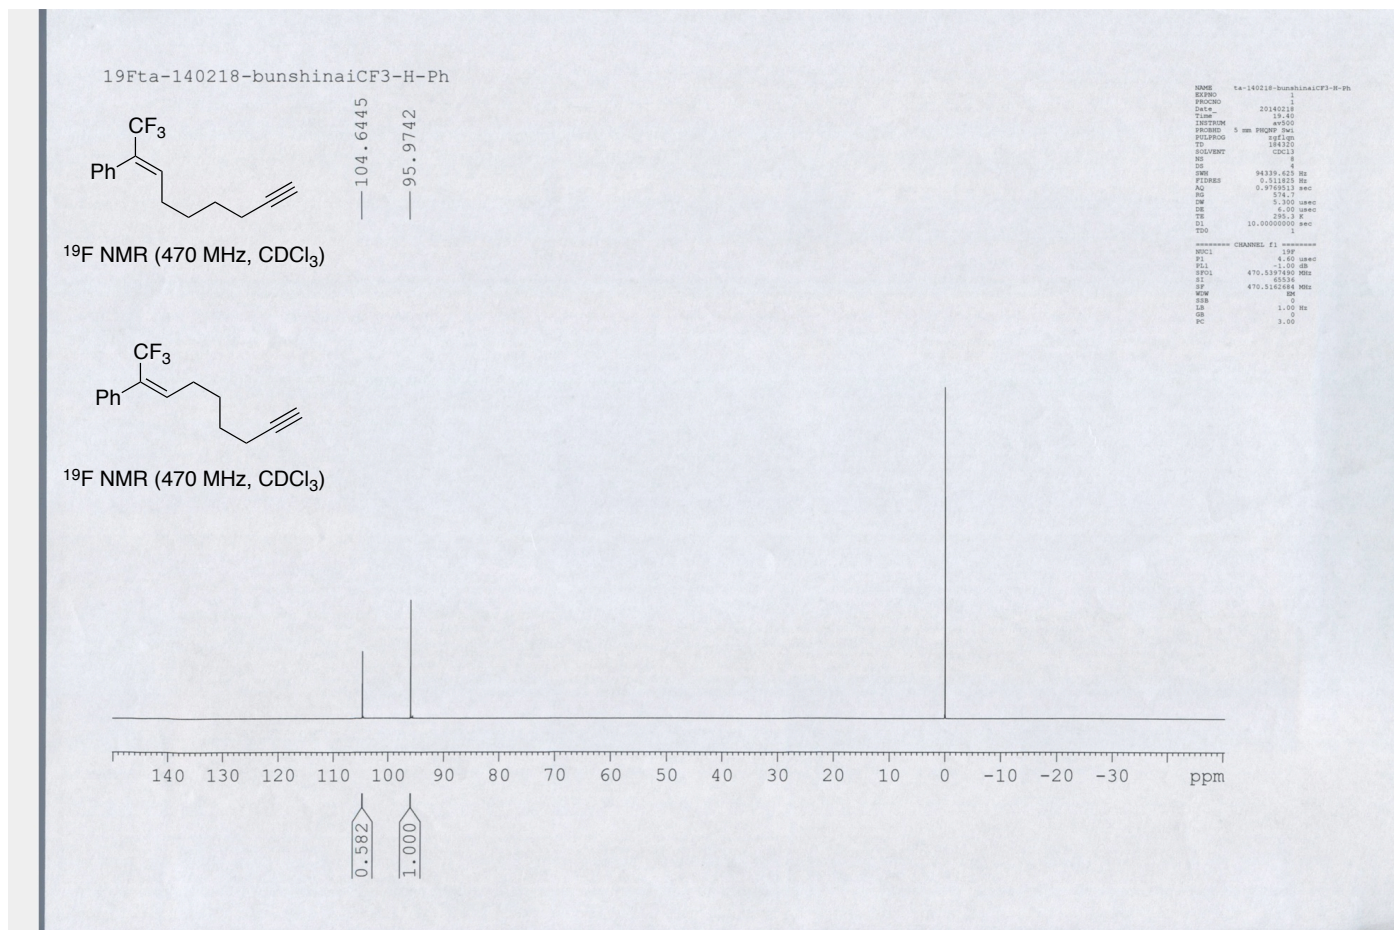

(*E*)-1,1,1-Trifluoro-2-phenyldec-2-en-8-yne (5)

(*Z*)-1,1,1-Trifluoro-2-phenyldec-2-en-8-yne (5)

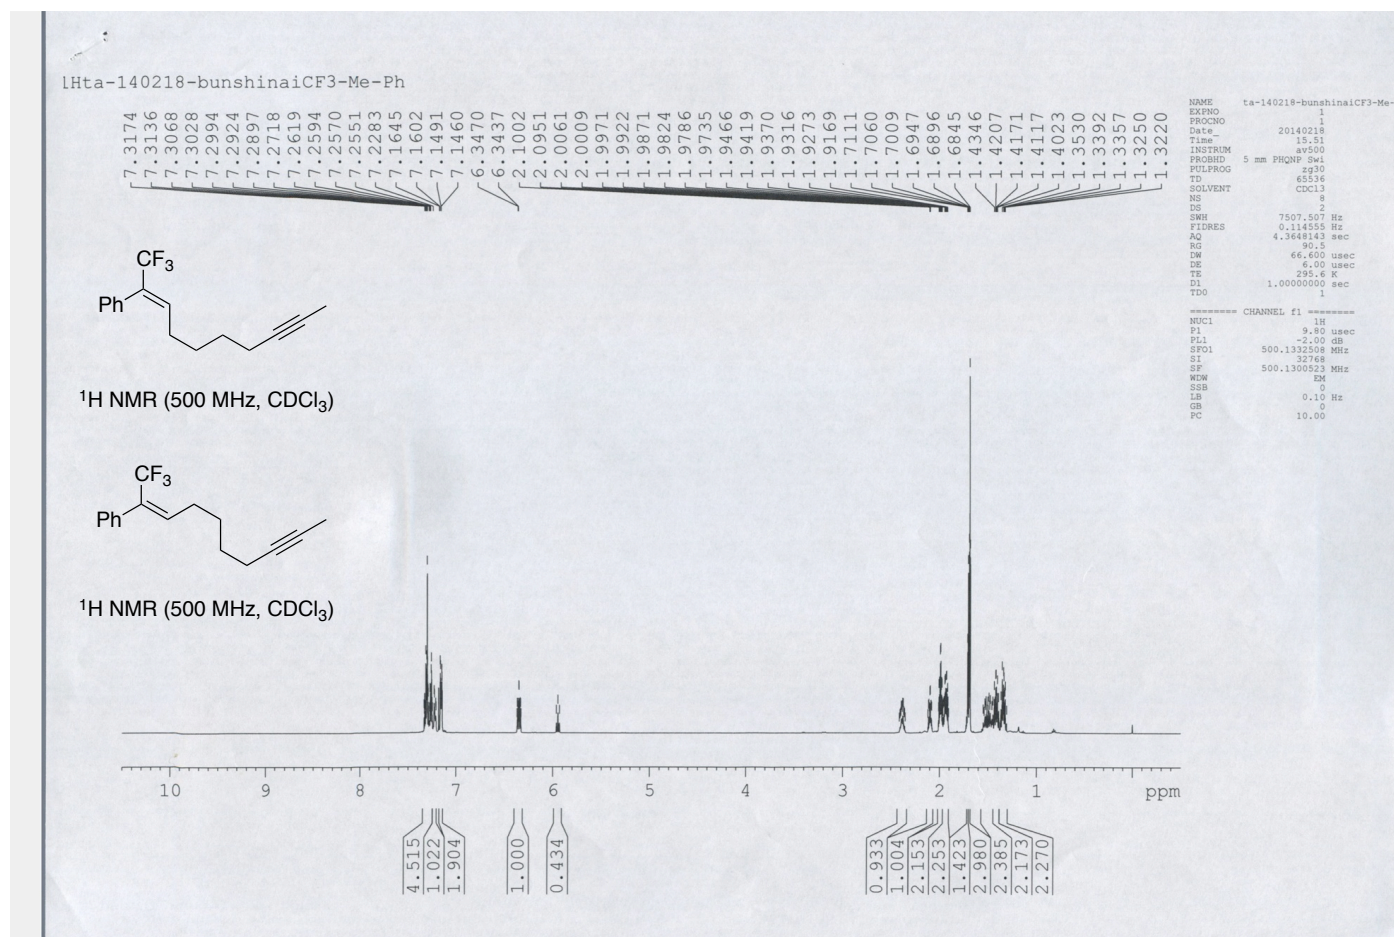



13Cta-140218-bunshinaicF3-Me-Ph

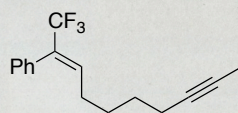

<sup>13</sup>C NMR (126 MHz, CDCl<sub>3</sub>)

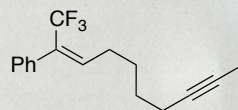

<sup>13</sup>C NMR (126 MHz, CDCl<sub>3</sub>)

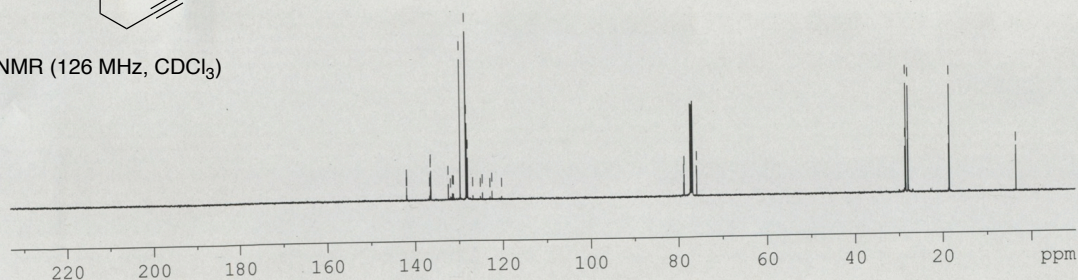

```
NAME ta-140218-bunshinaicF3-Me-Ph
EXPNO 1
PROCNO 1
Date_ 20140218
Time 14.16
INSTRUM spect
PROBHD 5 mm PRQNP 2w1
PULPROG zgpg30
TD 65536
SOLVENT CDCl3
NS 1
DS 4
SWH 94339.625 Hz
FIDRES 0.511823 Hz
AQ 0.9765513 sec
RG 327.2
SF 470.5162485 MHz
DE 6.00 usec
TE 295.6 K
D1 10.00000000 sec
TD0
===== CHANNEL f1 =====
NUC1 13C
P1 19.00 usec
PL 0.00 dB
SFO1 470.5162485 MHz
SF 470.5162485 MHz
WDW EM
SSB 0
LB 1.00 Hz
GB 0
PC 1.00
```

19Fta-140218-bunsinaicF3-Me-Ph

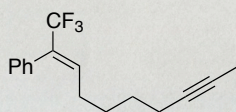

<sup>19</sup>F NMR (470 MHz, CDCl<sub>3</sub>)

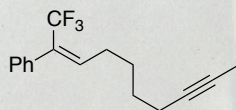

<sup>19</sup>F NMR (470 MHz, CDCl<sub>3</sub>)

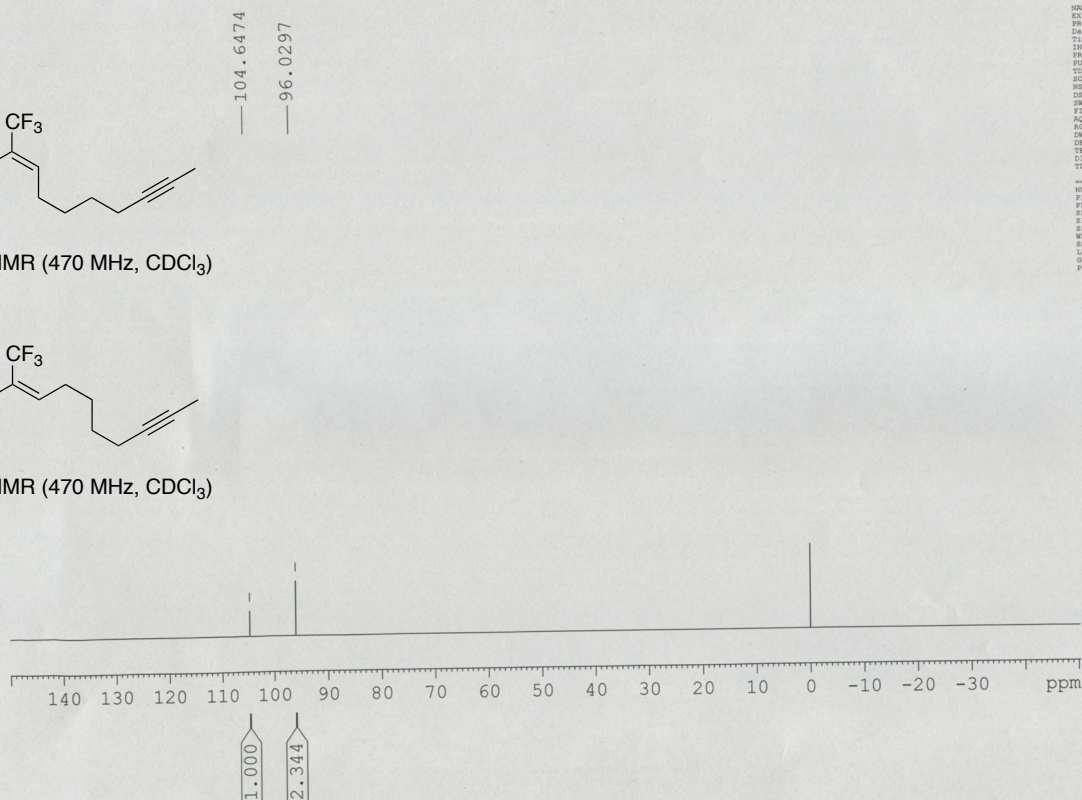

```
NAME ta-140218-bunsinaicF3-Me
EXPNO 1
PROCNO 1
Date_ 20140218
Time 14.16
INSTRUM spect
PROBHD 5 mm PRQNP 2w1
PULPROG zgpg30
TD 65536
SOLVENT CDCl3
NS 1
DS 4
SWH 94339.625 Hz
FIDRES 0.511823 Hz
AQ 0.9765513 sec
RG 327.2
SF 470.5162485 MHz
DE 6.00 usec
TE 295.6 K
D1 10.00000000 sec
TD0
===== CHANNEL f1 =====
NUC1 19F
P1 19.00 usec
PL 0.00 dB
SFO1 470.5162485 MHz
SF 470.5162485 MHz
WDW EM
SSB 0
LB 1.00 Hz
GB 0
PC 1.00
```



## 2-Fluoro-3-methyl-1-phenyl-5,6,7,7a-tetrahydro-4H-indene (9)

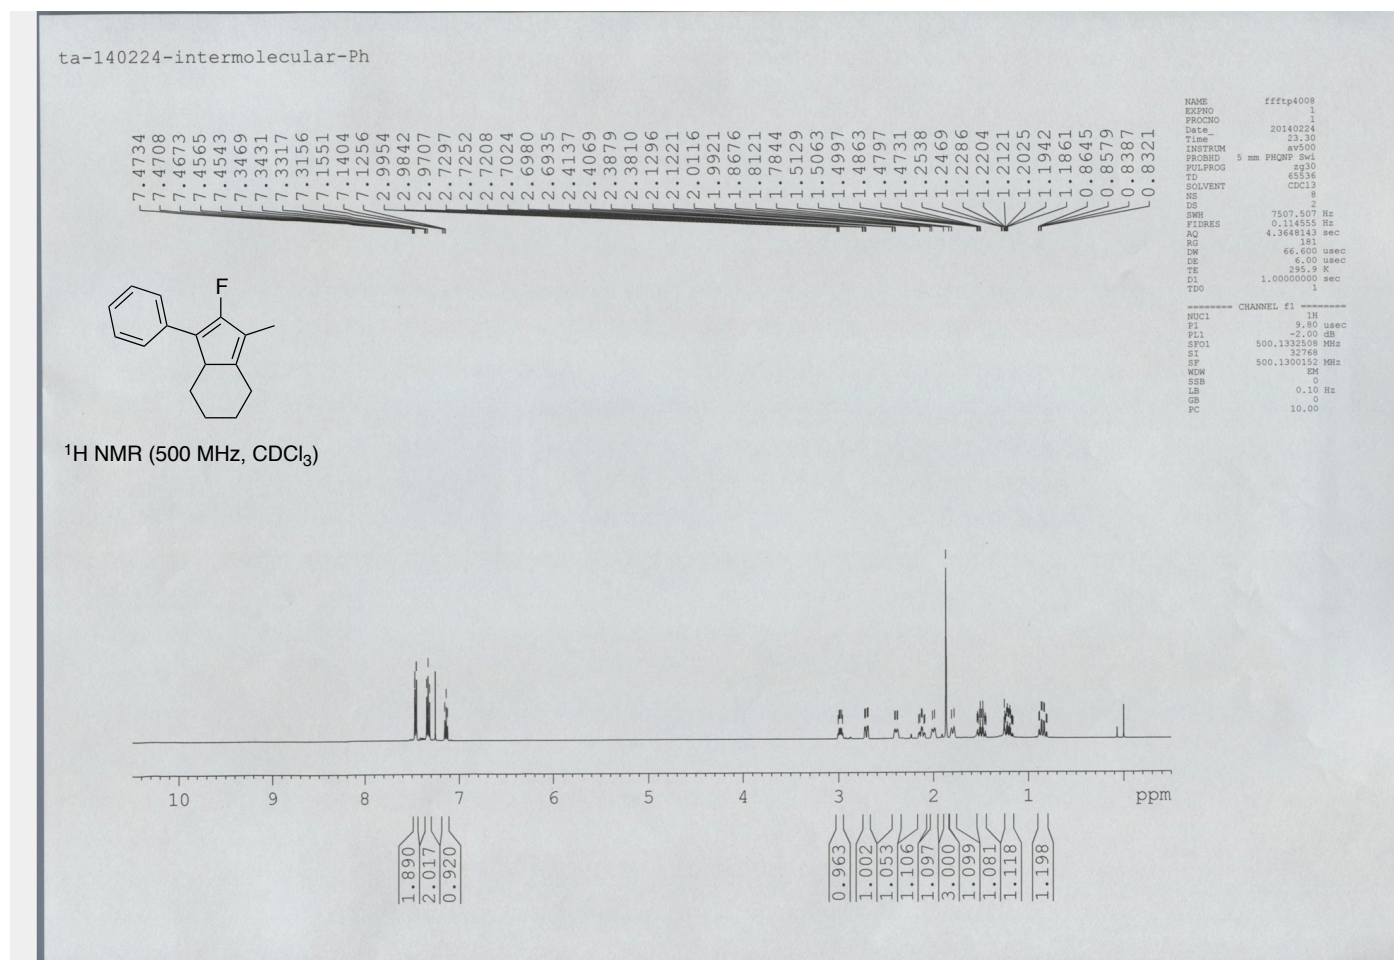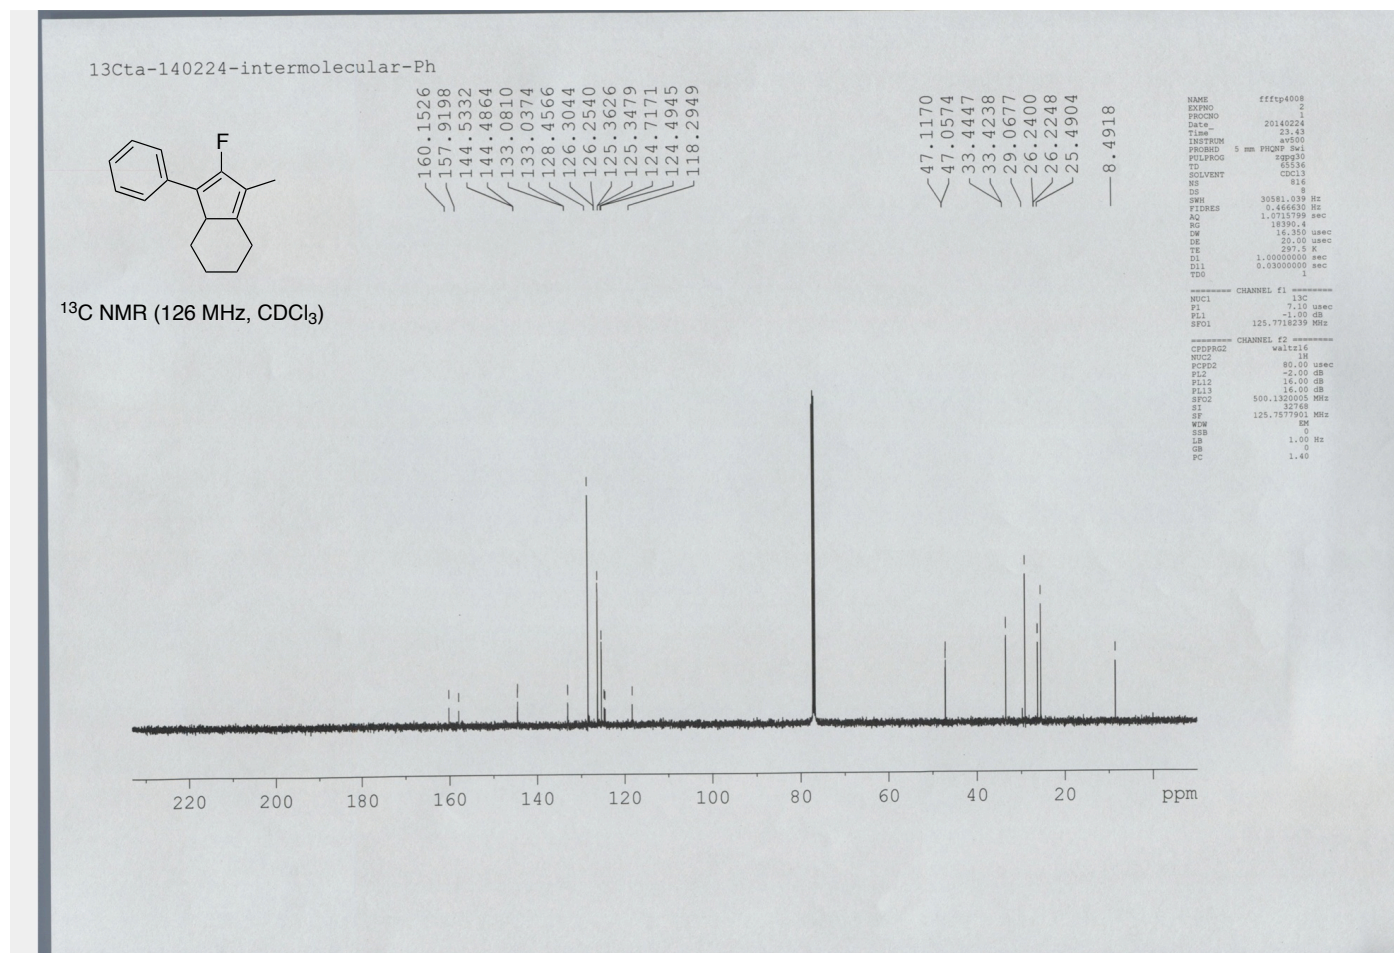



19Fta-140224-intermolecular-Ph

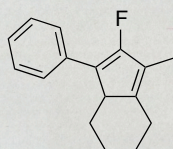

$^{19}\text{F}$  NMR (470 MHz,  $\text{CDCl}_3$ )

33.8174  
33.8038

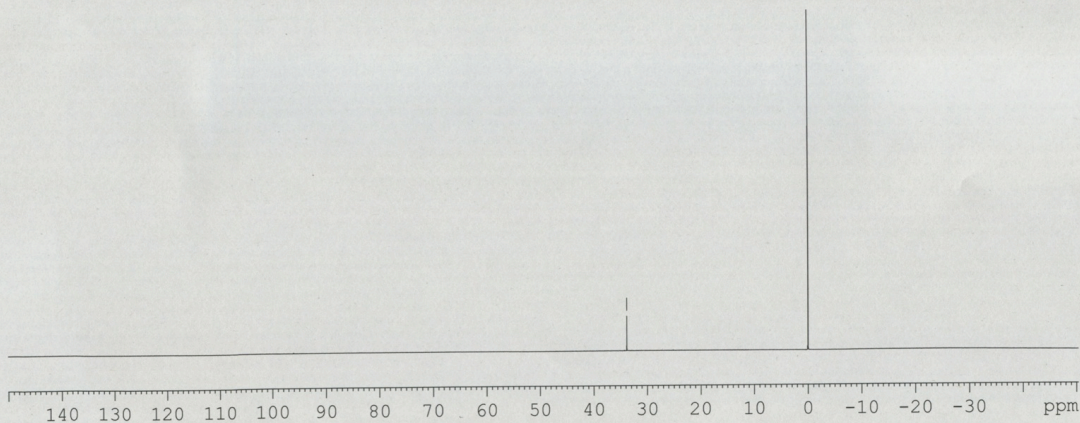

```

NAME      ta-140224-intermolecular-Ph
EXPNO     4
PROCNO    1
Date_     20140225
Time      0.25
INSTRUM    av500
PROBHD    5 mm 1H/13
PULPROG    zgpg30
TD         65536
F2         470.131
SOLVENT    CDCl3
NS         4
DS         4
SWH         94339.425 Hz
FIDRES     0.511923 Hz
AQ         0.9769513 sec
RG         374.7
DM         3.300 usec
DE         6.50 usec
TE         295.2 K
D1         10.00000000 sec
TDO        1
===== CHANNEL f1 =====
NUC1       19F
P1         4.00 usec
PL1        -1.00 dB
PL12       470.5387450 MHz
SFO1       470.5387457 MHz
SI         65536
SF         470.5387457 MHz
WDW         EM
SSB         0
LB         1.00 Hz
GB         0
PC         3.00
    
```
